# Supplementary material for: Experimental Aqueous Alteration of Cortical Bone Microarchitecture Analyzed by Quantitative Micro-Computed Tomography
Source: Frontiers journal article supplement (doi:10.3389/feart.2021.609496), 2021-04-22
Supplement: Data_Sheet_1.xlsx [file Data_Sheet_1.xlsx]

## Sheet: Raw data - before
Supplementary Material S1
Sample	Solution	Temperature	Time	Weight	Height	Diameter	pH	Tissue volume	Bone volume	Canal volume	Canal surface	Tissue surface	Bone surface	Cortical porosity	Bone volume fraction	Canal diameter	Degree of anisotropy	Reaction rim volume	Reaction rim fraction
		T	t	wt	h	d	pH	TV	BV	Ca.V	Ca.S	TS	BS	Ct.Po	BV/TV	Ca.Dm	DA	Rr.V	Rr.F
		°C	d	mg	mm	mm		mm3	mm³	mm³	mm2	mm2	mm2	%	%	µm	#	mm³	%
B1-12	FW	30	1	62.9	3.47	3.43	7.40271	29.3374	28.6903	0.645119	235.865	59.0669	287.571	2.19896	97.7944	18.4678	0.308872
B1-46			14	69.4	3.72	3.42	7.4	32.1493	31.55	0.598262	217.316	62.5164	275.628	1.86089	98.1361	16.3036	0.363993
B1-48			30	67.3	3.57	3.46	7.4	31.205	30.5754	0.629364	233.301	59.6134	290.885	2.01687	97.9823	18.9617	0.287512
B1-85	SW		1	69.8	3.39	3.49	7.82	30.5661	30.0781	0.487294	182.638	60.0143	238.967	1.59423	98.4034	15.9734	0.469221
B1-86			14	66.5	3.39	3.49	7.82	31.4309	30.8382	0.591825	218.016	61.6565	274.793	1.88294	98.1144	15.1258	0.458248
B1-32			30	68.2	3.53	3.46	8.04	31.246	30.7916	0.453729	176.875	60.9425	233.691	1.45212	98.5459	14.1312	0.32031
B1-09	FWS		1	64.8	3.59	3.45	7.16	30.1677	29.5124	0.654693	232.363	60.559	289.644	2.17018	97.8279	18.3674	0.351025
B1-15			14	65	3.58	3.45	7.16	30.229	29.4799	0.747183	318.806	60.124	370.544	2.47174	97.522	15.7599	0.277108
B1-14			30	62.1	3.41	3.46	7.16	29.2841	28.2344	0.680639	192.647	60.313	241.578	2.32426	97.6918	20.7396	0.419839
B1-29	FW	60	1	67.1	3.5	3.44	7.40271	30.7523	30.2371	0.514025	166.174	62.8844	221.927	1.6715	98.3247	15.672	0.358607
B1-38			3	68.4	3.52	3.46	7.4	31.0982	30.671	0.426276	165.915	60.9832	221.543	1.37074	98.6263	14.1583	0.433259
B1-06			7	66.1	3.52	3.47	7.4	30.8515	29.8639	0.595216	142.905	65.4568	200.849	1.92929	98.0756	22.9261	0.376414
B1-10			14	63.6	3.46	3.43	7.40271	29.7806	29.1864	0.593982	122.916	56.1993	178.272	1.99453	98.005	22.587	0.466727
B1-13			21	64.5	3.51	3.45	7.4	29.9405	29.4472	0.492717	148.474	60.0871	205.756	1.64565	98.3525	18.6546	0.311558
B1-28			30	65	3.48	3.44	7.4	29.7806	29.3716	0.414136	141.409	60.3896	194.651	1.39033	98.6053	13.9643	0.479477
B1-53	SW		1	67.1	3.52	3.42	8.04	30.7965	30.3387	0.457006	147.414	62.5567	205.649	1.48395	98.5133	17.6507	0.525204
B1-49			3	66.5	3.51	3.39	8.04	30.7083	30.2474	0.458603	161.534	62.7992	215.342	1.49342	98.4992	14.5608	0.498262
B1-88			7	67.5	3.36	3.49	7.82	30.8173	30.2949	0.521769	172.565	61.3119	230.394	1.6931	98.3048	18.1852	0.47075
B1-51			14	63.8	3.53	3.43	8.04	29.5272	29.0655	0.461175	148.037	59.0625	204.03	1.56186	98.4363	18.8518	0.391388
B1-52			21	67.9	3.47	3.45	8.04	31.307	30.888	0.417594	138.066	62.3512	193.017	1.33387	98.6618	15.8046	0.360034
B1-60			30	66.5	3.52	3.41	8.04	30.5943	30.1045	0.488384	171.37	60.0566	223.976	1.59633	98.399	16.1132	0.525397
B1-37	FWS		1	67	3.55	3.49	7.16	30.5355	29.9229	0.611464	252.923	60.3623	307.049	2.00247	97.9938	15.5703	0.438713
B1-67			3	65.4	3.53	3.46	7.16	29.9702	29.4746	0.495281	173.029	58.558	229.389	1.65258	98.3462	17.9522	0.373342
B1-70			7	64.4	3.43	3.47	7.16	29.5576	29.0326	0.524563	179.838	58.2299	235.144	1.77471	98.2238	19.0663	0.309414
B1-72			14	65.6	3.48	3.45	7.16	30.1148	29.6308	0.483597	175.084	58.1668	231.057	1.60585	98.3928	15.8051	0.389459
B1-73			21	66.3	3.43	3.47	7.16	30.175	29.739	0.435298	159.957	59.5307	216.426	1.44258	98.5551	16.0483	0.359542
B1-81			30	66	3.49	3.44	7.16	30.4008	29.9037	0.496844	173.313	58.1318	230.267	1.63431	98.3649	17.0926	0.347286
B1-39	FW	90	1	64.4	3.45	3.29	7.40271	29.3411	28.7423	0.596928	232.079	61.3547	283.859	2.03444	97.9594	17.0067	0.408368
B1-40			3	67.2	3.43	3.45	7.4	30.6077	30.1562	0.451012	133.989	59.2683	190.805	1.47353	98.5249	20.6341	0.396249
B1-41			7	64.7	3.46	3.43	7.4	29.6837	29.2239	0.457312	145.431	62.8928	196.865	1.54061	98.4511	17.612	0.531943
B1-43			14	67.3	3.44	3.44	7.40271	31.0289	30.5117	0.514644	167.938	66.415	222.053	1.65859	98.333	15.5861	0.385274
B1-30			21	69.2	3.53	3.46	7.4	31.5373	31.1104	0.42641	149.967	60.5147	207.227	1.35208	98.6465	14.9355	0.333354
B1-31			30	65.1	3.57	3.43	7.4	29.6895	29.2547	0.433692	143.737	59.7015	196.768	1.46076	98.5353	14.5376	0.389073
B1-02	SW		1	62.6	3.43	3.41	8.04	29.1937	28.5445	0.647091	245.202	61.728	297.626	2.21654	97.7761	17.3256	0.242672
B1-04			3	57.1	3.35	3.37	8.04	26.8154	26.2282	0.586669	160.812	53.5202	211.533	2.1878	97.8102	20.9293	0.41643
B1-07			7	64.8	3.62	3.37	7.82	29.5705	29.1905	0.379225	128.492	59.2873	184.589	1.28244	98.7149	16.1095	0.398411
B1-08			14	67.5	3.59	3.4	8.04	30.7674	30.3336	0.432731	156.405	62.0977	214.148	1.40646	98.5901	15.9413	0.331325
B1-16			21	65.4	3.41	3.4	8.04	29.7012	29.3043	0.396538	144.921	58.9945	202.032	1.33509	98.6636	15.4082	0.409045
B1-20			30	62.8	3.42	3.41	8.04	28.8698	28.3754	0.492041	177.817	61.8087	228.681	1.70435	98.2875	16.2094	0.335714
B1-75	FWS		1	65.3	3.46	3.47	7.16	29.8188	29.3159	0.501749	224.502	57.4214	275.978	1.68266	98.3136	13.0652	0.353299
B1-76			3	65.6	3.46	3.47	7.16	29.9829	29.4336	0.54761	198.737	59.0185	251.521	1.82641	98.1681	17.7317	0.331755
B1-77			7	65.5	3.46	3.47	7.16	29.9547	29.5042	0.450167	166.586	58.7677	224.2	1.50283	98.4962	16.8753	0.301721
B1-78			14	66	3.48	3.46	7.16	29.9711	29.5598	0.411155	151.422	58.1521	208.74	1.37184	98.6277	15.5054	0.420219
B1-74			21	66.1	3.49	3.48	7.16	30.477	29.9708	0.505834	169.027	59.0113	226.508	1.65972	98.3391	17.2276	0.415745
B1-82			30	66.7	3.51	3.44	7.16	30.4004	29.945	0.454461	178.356	61.098	235.426	1.49492	98.5021	14.7321	0.389739
