# Supplementary material for: Experimental Aqueous Alteration of Cortical Bone Microarchitecture Analyzed by Quantitative Micro-Computed Tomography
Source: Frontiers journal article supplement (doi:10.3389/feart.2021.609496), 2021-04-22
Supplement: Data_Sheet_2.xlsx [file Data_Sheet_2.xlsx]

## Sheet: Raw data - after
Supplementary Material S2
Sample	Solution	Temperature	Time	Weight	Height	Diameter	pH	Tissue Volume	Bone volume	Canal volume	Canal surface	Tissue surface	Bone surface	Cortical porosity	Bone volume fraction	Canal diameter	Degree of anisotropy	Reaction rim volume	Reaction rim fraction
		T	t	wt	h	d	pH	TV	BV	Ca.V	Ca.S	TS	BS	Ct.Po	BV/TV	Ca.Dm	DA	Rr.V	Rr.F
		°C	d	mg	mm	mm		mm3	mm³	mm³	mm2	mm2	mm2	%	%	µm	#	mm³	%
B1-12	FW	30	1	62.3			7.39222	29.1828	28.6093	0.571954	180.259	58.8819	231.692	1.9599	98.0346	19.5105	0.353057	0.0403498	0.141037
B1-46			14	69.4			7.76483	32.0068	31.4857	0.520304	167.349	62.3777	226.481	1.6256	98.3719	17.4442	0.413836	0.149025	0.473311
B1-48			30	67.6			7.65562	31.4447	30.896	0.546586	169.436	61.9945	222.645	1.73824	98.2549	19.903	0.366848	0.220978	0.715233
B1-85	SW		1	69.7			7.71167	30.9326	30.3155	0.61526	259.897	61.8511	311.671	1.98903	98.0051	14.4688	0.442142	0.0291884	0.096282
B1-86			14	67			7.71227	31.4436	30.8977	0.545761	196.154	59.5595	254.67	1.73568	98.2637	15.6874	0.488587	0.042392	0.137201
B1-32			30	68.6			8.13705	31.447	30.9793	0.467083	186.29	59.7782	242.845	1.4853	98.5128	14.0055	0.403476	0.020626	0.0665798
B1-09	FWS		1	64.7			6.53804	30.271	29.6291	0.639254	199.728	62.2597	250.329	2.11177	97.8797	19.1138	0.445657	0.0810175	0.273439
B1-15			14	64.6			7.53893	30.0466	29.4956	0.550044	181.168	61.0617	237.571	1.83064	98.1663	18.4518	0.339637	0.306831	1.04026
B1-14			30	61.4			7.20535	29.318	28.617	0.69888	202.32	59.9743	253.531	2.38379	97.6092	20.1786	0.430742	0.478533	1.6722
B1-29	FW	60	1	67.2			7.6476	31.0854	30.5375	0.546713	191.413	61.0036	245.812	1.75875	98.2375	15.6845	0.455621	0.0460191	0.150697
B1-38			3	68.2			7.76587	31.503	31.0537	0.448867	181.07	59.3258	237.61	1.42484	98.5738	14.0649	0.400475	0.012449	0.0400887
B1-06			7	65.6			7.69762	31.3332	30.5941	0.737782	221.056	65.0544	277.974	2.35463	97.6411	21.6216	0.385884	0.243069	0.794497
B1-10			14	63.1			7.9144	30.0358	29.2558	0.779255	246.986	60.4665	302.263	2.59442	97.4031	19.7366	0.30803	0.24639	0.842193
B1-13			21	63.9			7.73642	30.1117	29.5555	0.554771	193.856	60.5666	248.145	1.84238	98.1529	17.303	0.28045	0.33342	1.12811
B1-28			30	64.8			7.67797	29.9811	29.5179	0.462235	188.206	60.9857	244.005	1.54176	98.455	12.9616	0.477432	0.365778	1.23918
B1-53	SW		1	67.4			7.90272	30.9429	30.4496	0.493057	171.927	59.5159	230.056	1.59344	98.4058	17.4362	0.500957	0.00776717	0.0255083
B1-49			3	66.8			7.95211	30.7124	30.2578	0.454199	162.134	59.3218	219.632	1.47888	98.5198	14.6862	0.521839	0.0097789	0.0323186
B1-88			7	67.6			7.5656	31.2046	30.6487	0.555395	195.667	60.7917	253.057	1.77985	98.2185	17.6674	0.474508	0.0475287	0.155076
B1-51			14	64.3			7.90365	30.0646	29.5508	0.512834	168.864	60.207	223.08	1.70577	98.2909	18.2944	0.396143	0.0221096	0.0748191
B1-52			21	68.6			7.92298	31.2898	30.801	0.488591	189.831	59.3828	247.315	1.56151	98.4379	15.1701	0.396777	0.00519716	0.0168734
B1-60			30	67.1			7.7072	30.509	30.0506	0.458152	167.956	59.0984	225.295	1.50169	98.4975	16.3267	0.478751	0.0133738	0.0445042
B1-37	FWS		1	66.8			6.71496	30.4947	29.982	0.511529	183.639	61.2074	238.898	1.67744	98.3189	17.0953	0.456387	0.0359835	0.120017
B1-67			3	65			7.07952	29.8522	29.3527	0.498217	169.593	61.8935	224.528	1.66895	98.3267	17.8331	0.417695	0.135143	0.460411
B1-70			7	63.4			7.25608	29.4391	28.9175	0.520515	179.102	58.9879	232.348	1.7681	98.2279	18.5456	0.337882	0.0108005	0.0373495
B1-72			14	64.5			7.59793	29.9685	29.4883	0.479318	175.262	58.6498	229.444	1.59941	98.3976	15.6481	0.397374	0.186835	0.63359
B1-73			21	65.6			7.67635	30.1739	29.7682	0.404489	137.429	60.1371	192.235	1.34052	98.6554	16.3948	0.432178	0.168561	0.566245
B1-81			30	65			7.6885	30.2206	29.7462	0.474071	161.156	57.9737	217.23	1.5687	98.43	17.162	0.370938	0.055038	0.185025
B1-39	FW	90	1	63.9			7.65809	29.4936	28.9829	0.50964	171.973	58.5465	224.881	1.72797	98.2686	18.7279	0.408579	0.0272563	0.0940429
B1-40			3	66.4			7.6188	30.7365	30.2354	0.500425	170.257	59.3124	226.75	1.62811	98.3697	19.2646	0.359582	0.138299	0.457409
B1-41			7	62.8			7.51076	29.6378	29.118	0.518294	192.705	60.4641	245.102	1.74876	98.2463	16.8521	0.465774	0.291884	1.00242
B1-43			14	60.4			7.41282	31.1324	30.5429	0.587572	234.144	64.3733	287.578	1.88733	98.1063	14.0102	0.397614	0.243961	0.79875
B1-30			21	61.5			7.53856	31.8829	31.3589	0.523258	218.948	62.5802	276.714	1.64119	98.3567	13.6972	0.365052	0.136433	0.43507
B1-31			30	53.7			7.33316	30.0643	29.5558	0.507191	197.483	61.8483	251.615	1.68702	98.3086	13.927	0.378928	0.297108	1.00524
B1-02	SW		1	62			7.69762	29.1503	28.1026	0.695254	225.973	60.8445	263.737	2.38507	97.727	18.8435	0.37668	0.0187244	0.0666289
B1-04			3	55.4			7.62862	26.9836	26.3543	0.628927	184.848	53.2478	236.341	2.33077	97.6678	20.2959	0.441258	0.00977122	0.0370764
B1-07			7	64.4			7.57951	29.6587	29.1976	0.460328	174.826	58.8697	229.807	1.55209	98.51	15.2394	0.427544	0.00997995	0.0341807
B1-08			14	66.5			7.42236	30.7866	30.2689	0.516748	212.894	61.3998	269.701	1.67848	98.3184	14.7843	0.440197	0.0628966	0.207793
B1-16			21	63			7.47915	29.8222	29.3767	0.444418	177.003	60.1964	232.427	1.49023	98.5064	14.6734	0.33984	0.0279383	0.0951036
B1-20			30	60.4			7.42048	28.7184	28.2681	0.448989	147.499	61.8379	203.247	1.56342	98.432	17.6254	0.380319	0.0240763	0.0851714
B1-75	FWS		1	64.2			6.7938	29.5412	29.1587	0.381822	135.846	57.6787	189.318	1.29251	98.7053	14.8386	0.437169	0.0441256	0.151329
B1-76			3	64			7.2852	29.6844	29.1838	0.499681	173.46	59.2026	227.971	1.68331	98.3137	18.2462	0.383638	0.154271	0.528618
B1-77			7	63.6			7.26724	29.9402	29.3902	0.547622	207.328	62.4517	258.253	1.82905	98.1629	15.6326	0.382529	0.175039	0.595569
B1-78			14	58.7			7.59772	29.9418	29.4801	0.460936	212.679	60.2768	268.429	1.53944	98.4578	13.1122	0.318134	0.218611	0.741556
B1-74			21	54.6			7.13878	30.8981	30.2889	0.607162	255.327	62.9295	308.246	1.96505	98.0284	14.4506	0.30165	0.209493	0.69165
B1-82			30	54.6			6.55483	30.5641	30.1623	0.400599	144.461	60.68	199.146	1.31069	98.6854	14.7562	0.410538	0.341641	1.13268
