# Supplementary material for: Experimental Aqueous Alteration of Cortical Bone Microarchitecture Analyzed by Quantitative Micro-Computed Tomography
Source: Frontiers journal article supplement (doi:10.3389/feart.2021.609496), 2021-04-22
Supplement: Data_Sheet_3.xlsx [file Data_Sheet_3.xlsx]

## Sheet: Raw data - difference
Supplementary Material S3
Sample	Solution	Temperature	Time	Weight	Height	Diameter	pH	Tissue volume	Bone volume	Canal volume	Canal surface	Tissue surface	Bone surface	Cortical porosity	Bone volume fraction	Canal diameter	Degree of anisotropy	Reaction rim volume	Reaction rim fraction
		T	t	wt	h	d	pH	TV	BV	Ca.V	Ca.S	TS	BS	Ct.Po	BV/TV	Ca.Dm	DA	Rr.V	Rr.F
		°C	d	mg	mm	mm		mm3	mm³	mm³	mm2	mm2	mm2	%	%	µm	#	mm³	%
B1-12	FW	30	1	-0.6			-0.010493	-0.154577	-0.0810548	-0.0731655	-55.6057	-0.185033	-55.8788	-0.239067	0.240255	1.04267	0.0441854	0.0403498	0.141037
B1-46			14	0			0.364826	-0.142442	-0.0643118	-0.0779581	-49.9672	-0.13864	-49.1469	-0.235285	0.23581	1.14059	0.0498433	0.149025	0.473311
B1-48			30	0.3			0.255618	0.239729	0.320604	-0.0827781	-63.865	2.38105	-68.24	-0.278626	0.272579	0.94129	0.0793363	0.220978	0.715233
B1-85	SW		1	-0.1			-0.108333	0.366515	0.237441	0.127967	77.259	1.83683	72.7036	0.394805	-0.398358	-1.50453	-0.0270792	0.0291884	0.096282
B1-86			14	0.5			-0.107728	0.0127575	0.0594755	-0.0460636	-21.8621	-2.09692	-20.123	-0.14726	0.149342	0.56162	0.0303389	0.042392	0.137201
B1-32			30	0.4			0.0970451	0.201006	0.187695	0.0133546	9.41561	-1.16432	9.15386	0.0331851	-0.0330331	-0.12568	0.0831654	0.020626	0.0665798
B1-09	FWS		1	-0.1			-0.62196	0.103246	0.116674	-0.0154389	-32.6352	1.7007	-39.3153	-0.0584042	0.0517667	0.74642	0.0946317	0.0810175	0.273439
B1-15			14	-0.4			0.378932	-0.182395	0.0157126	-0.197139	-137.637	0.937679	-132.972	-0.641107	0.644294	2.69187	0.0625291	0.306831	1.04026
B1-14			30	-0.7			0.0453513	0.0338337	0.38263	0.0182408	9.67325	-0.338755	11.9538	0.0595349	-0.0825983	-0.561	0.0109028	0.478533	1.6722
B1-29	FW	60	1	0.1			0.244892	0.333086	0.300401	0.0326879	25.2385	-1.88085	23.8851	0.0872447	-0.0871928	0.0125	0.0970135	0.0460191	0.150697
B1-38			3	-0.2			0.365873	0.404739	0.382634	0.0225915	15.1543	-1.65741	16.0664	0.0541014	-0.0525207	-0.09338	-0.0327839	0.012449	0.0400887
B1-06			7	-0.5			0.297617	0.481643	0.730191	0.142566	78.1505	-0.402453	77.1249	0.425345	-0.434514	-1.30447	0.00947012	0.243069	0.794497
B1-10			14	-0.5			0.511692	0.255201	0.0693396	0.185273	124.07	4.26721	123.991	0.599895	-0.601851	-2.8504	-0.158697	0.24639	0.842193
B1-13			21	-0.6			0.336416	0.171215	0.108291	0.0620543	45.3826	0.479433	42.3893	0.196723	-0.199602	-1.35166	-0.031108	0.33342	1.12811
B1-28			30	-0.2			0.277966	0.200512	0.146302	0.048099	46.7967	0.596082	49.3537	0.151431	-0.150315	-1.00267	-0.00204515	0.365778	1.23918
B1-53	SW		1	0.3			-0.13728	0.146385	0.110961	0.0360513	24.5131	-3.04074	24.4076	0.109489	-0.107446	-0.21453	-0.0242469	0.00776717	0.0255083
B1-49			3	0.3			-0.0878937	0.00408019	0.0103648	-0.00440414	0.600637	-3.47744	4.29071	-0.0145384	0.0206623	0.12543	0.0235767	0.0097789	0.0323186
B1-88			7	0.1			-0.254395	0.387323	0.353845	0.0336265	23.1021	-0.520167	22.6623	0.0867458	-0.0862425	-0.5178	0.00375799	0.0475287	0.155076
B1-51			14	0.5			-0.136354	0.537395	0.485256	0.0516583	20.827	1.14441	19.0494	0.143906	-0.145474	-0.55744	0.00475448	0.0221096	0.0748191
B1-52			21	0.7			-0.117025	-0.0171956	-0.0870272	0.0709971	51.7654	-2.9684	54.2973	0.227635	-0.223913	-0.63449	0.0367438	0.00519716	0.0168734
B1-60			30	0.6			-0.332799	-0.0852408	-0.0538283	-0.0302318	-3.41355	-0.958222	1.31893	-0.0946312	0.0984882	0.21352	-0.0466458	0.0133738	0.0445042
B1-37	FWS		1	-0.2			-0.445039	-0.0408039	0.0591524	-0.0999344	-69.2843	0.845073	-68.1507	-0.325032	0.325099	1.52506	0.017674	0.0359835	0.120017
B1-67			3	-0.4			-0.080483	-0.11806	-0.121933	0.00293563	-3.43634	3.33557	-4.86081	0.0163695	-0.0195146	-0.11909	0.0443538	0.135143	0.460411
B1-70			7	-1			0.0960758	-0.118446	-0.115122	-0.00404819	-0.735699	0.757976	-2.79599	-0.00661062	0.0041462	-0.52065	0.0284682	0.0108005	0.0373495
B1-72			14	-1.1			0.437929	-0.146273	-0.142509	-0.00427899	0.177713	0.482988	-1.61362	-0.00644033	0.00471585	-0.15696	0.00791486	0.186835	0.63359
B1-73			21	-0.7			0.516346	-0.00111312	0.029148	-0.0308094	-22.5284	0.606453	-24.191	-0.102053	0.100236	0.34654	0.0726361	0.211758	0.566245
B1-81			30	-1			0.528496	-0.180205	-0.157561	-0.0227732	-12.1565	-0.158063	-13.0375	-0.065611	0.0651778	0.06941	0.0236527	0.055038	0.185025
B1-39	FW	90	1	-0.5			0.255378	0.152493	0.240562	-0.087287	-60.106	-2.80818	-58.9776	-0.306472	0.309156	1.72116	0.0002104	0.0272563	0.0940429
B1-40			3	-0.8			0.218801	0.128803	0.0791865	0.0494133	36.268	0.044078	35.9456	0.154589	-0.155244	-1.36948	-0.0366666	0.138299	0.457409
B1-41			7	-1.9			0.110756	-0.0459066	-0.105891	0.0609829	47.2739	-2.42874	48.2366	0.208147	-0.204791	-0.75989	-0.0661693	0.291884	1.00242
B1-43			14	-6.9			0.010104	0.10349	0.031196	0.0729279	66.2056	-2.04165	65.5246	0.228737	-0.226673	-1.57587	0.0123398	0.243961	0.79875
B1-30			21	-7.7			0.138563	0.345625	0.248537	0.0968484	68.9811	2.06548	69.4878	0.289106	-0.289841	-1.23835	0.0316976	0.136433	0.43507
B1-31			30	-11.4			-0.0668422	0.374729	0.301095	0.0734991	53.7468	2.1468	54.8465	0.226266	-0.226666	-0.61065	-0.0101452	0.297108	1.00524
B1-02	SW		1	-0.6			-0.342383	-0.0434338	-0.441914	0.0481632	-19.2284	-0.883571	-33.8889	0.168526	-0.0490664	1.51788	0.134008	0.0187244	0.0666289
B1-04			3	-1.7			-0.411377	0.168165	0.126066	0.0422581	24.0355	-0.272384	24.8077	0.142972	-0.14237	-0.63337	0.0248281	0.00977122	0.0370764
B1-07			7	-0.4			-0.240488	0.0881535	0.0071189	0.0811028	46.3341	-0.417665	45.2175	0.269642	-0.204886	-0.8701	0.0291338	0.00997995	0.0341807
B1-08			14	-1			-0.617644	0.0191704	-0.0647713	0.0840171	56.4893	-0.697895	55.5539	0.272026	-0.271779	-1.15698	0.108873	0.0628966	0.207793
B1-16			21	-2.4			-0.560847	0.120976	0.0724853	0.0478794	32.0817	1.20192	30.3951	0.155134	-0.157178	-0.73478	-0.0692048	0.0279383	0.0951036
B1-20			30	-2.4			-0.619519	-0.151396	-0.107292	-0.0430512	-30.3188	0.0291646	-25.4343	-0.140923	0.144546	1.41606	0.0446048	0.0240763	0.0851714
B1-75	FWS		1	-1.1			-0.366197	-0.277592	-0.157193	-0.119927	-88.6561	0.257286	-86.6594	-0.390154	0.391715	1.77338	0.0838702	0.0441256	0.151329
B1-76			3	-1.6			0.125205	-0.29849	-0.249795	-0.0479294	-25.2765	0.184144	-23.55	-0.143098	0.14562	0.51448	0.0518836	0.154271	0.528618
B1-77			7	-1.9			0.107238	-0.0145121	-0.114066	0.0974545	40.7415	3.68399	34.0533	0.326226	-0.33324	-1.24273	0.0808079	0.175039	0.595569
B1-78			14	-7.3			0.437724	-0.0292246	-0.0797116	0.0497813	61.2568	2.12468	59.6887	0.167599	-0.169956	-2.39316	-0.102085	0.218611	0.741556
B1-74			21	-11.5			-0.0212209	0.42108	0.318083	0.101328	86.2995	3.9182	81.7378	0.305325	-0.310707	-2.77699	-0.114095	0.209493	0.69165
B1-82			30	-12.1			-0.605165	0.163665	0.217228	-0.0538614	-33.8944	-0.418003	-36.2805	-0.18423	0.18327	0.02414	0.0207993	0.341641	1.13268
