# Supplementary material for: Experimental Aqueous Alteration of Cortical Bone Microarchitecture Analyzed by Quantitative Micro-Computed Tomography
Source: Frontiers journal article supplement (doi:10.3389/feart.2021.609496), 2021-04-22
Supplement: Data_Sheet_5.xlsx [file Data_Sheet_5.xlsx]

## Sheet: Beam hardening
Supplementary Material S5
B1-51 before	1 px = 3 µm		B1-51 Z-stack			B1-28 after			B1-28 Z-stack
Distance (px)	Gray-scale value		Distance (px)	Gray-scale value		Distance (px)	Gray-scale value		Distance (px)	Gray-scale value
1	0		1	35855		0	233		0	33000
2	38		2	59982		1	0		1	35347
3	4584		3	105195		2	250		2	34590
4	38099		4	134630		3	1332		3	24705
5	75060		5	102300		4	2197		4	29941
6	88348		6	64801		5	1144		5	22555
7	94016		7	37318		6	90		6	11334
8	104913		8	91941		7	1163		7	11166
9	108501		9	292307		8	4332		8	16112
10	102451		10	563527		9	5066		9	16871
11	91722		11	773162		10	3753		10	38204
12	82474		12	844881		11	1315		11	72135
13	80087		13	798266		12	0		12	112455
14	83407		14	724319		13	0		13	128725
15	79019		15	654053		14	0		14	116793
16	68062		16	598638		15	0		15	81021
17	64098		17	591608		16	0		16	52847
18	66610		18	604329		17	4709		17	55203
19	65584		19	634757		18	31634		18	85089
20	68142		20	665312		19	83051		19	98061
21	73747		21	695712		20	129462		20	99648
22	78772		22	700294		21	145995		21	119597
23	75378		23	674299		22	136844		22	288476
24	71840		24	620393		23	120728		23	656299
25	71056		25	582158		24	107266		24	1057106
26	68103		26	589215		25	93997		25	1261774
27	62714		27	632381		26	79949		26	1157142
28	59449		28	665015		27	69413		27	966301
29	56360		29	670918		28	63391		28	815808
30	56099		30	679388		29	65763		29	731402
31	60072		31	683718		30	72846		30	673071
32	64727		32	699634		31	76335		31	612334
33	68926		33	721510		32	74666		32	565933
34	74555		34	728408		33	74015		33	551657
35	81380		35	705613		34	75281		34	583161
36	83981		36	683290		35	79604		35	650499
37	77157		37	653918		36	80408		36	689866
38	64722		38	686409		37	73970		37	691264
39	54652		39	713511		38	67946		38	670710
40	53504		40	722037		39	63856		39	671227
41	54788		41	697799		40	62824		40	691534
42	48637		42	639563		41	66856		41	701412
43	45465		43	585364		42	75217		42	701802
44	41969		44	548048		43	86733		43	695035
45	45701		45	523600		44	94793		44	692371
46	57856		46	544683		45	101430		45	686205
47	68084		47	588706		46	100799		46	691940
48	63088		48	616466		47	88780		47	709290
49	52075		49	606960		48	77464		48	719313
50	40019		50	590480		49	75163		49	693116
51	43098		51	614133		50	81779		50	618341
52	53751		52	649728		51	85559		51	548752
53	65877		53	707286		52	82510		52	539399
54	71118		54	730199		53	79234		53	580189
55	69936		55	747608		54	82043		54	664913
56	65521		56	767775		55	85275		55	720163
57	59488		57	803766		56	80401		56	713055
58	55691		58	833700		57	71000		57	673900
59	58702		59	798205		58	62657		58	678688
60	66564		60	771031		59	62141		59	691100
61	71130		61	761276		60	67794		60	700936
62	72899		62	748883		61	69828		61	713261
63	68231		63	727061		62	62876		62	733473
64	62870		64	699644		63	50069		63	739898
65	61879		65	678330		64	45522		64	730108
66	60694		66	663492		65	53709		65	709641
67	60632		67	662634		66	69776		66	671444
68	67963		68	717698		67	74573		67	640188
69	75005		69	792483		68	61019		68	622495
70	79497		70	782844		69	46428		69	586162
71	81965		71	704080		70	43964		70	550587
72	82426		72	633008		71	50469		71	531411
73	71024		73	621285		72	57445		72	579877
74	57423		74	672725		73	64460		73	633992
75	52270		75	691459		74	74074		74	678472
76	63198		76	637457		75	78960		75	667312
77	73226		77	595705		76	75852		76	609733
78	74464		78	623625		77	71572		77	542548
79	70459		79	718826		78	67690		78	490588
80	70773		80	756992		79	60629		79	448700
81	72025		81	709512		80	49144		80	418820
82	74502		82	605785		81	44521		81	410477
83	80020		83	589941		82	49908		82	430689
84	88075		84	637452		83	52965		83	477287
85	91779		85	657561		84	50056		84	522002
86	92338		86	605544		85	48863		85	563741
87	88999		87	554934		86	54298		86	574413
88	83640		88	573212		87	60730		87	586471
89	72864		89	636061		88	66345		88	597928
90	68812		90	688419		89	69193		89	584499
91	69789		91	696138		90	69701		90	533914
92	73653		92	696524		91	70923		91	473782
93	72649		93	675741		92	74559		92	412537
94	64960		94	586693		93	75930		93	434203
95	56415		95	489490		94	70756		94	521956
96	55321		96	453157		95	67476		95	584931
97	56948		97	505907		96	73708		96	578105
98	64071		98	546865		97	85488		97	555112
99	70318		99	569238		98	93478		98	562761
100	73984		100	605563		99	95965		99	579502
101	71910		101	660379		100	91344		100	564837
102	69579		102	679081		101	78275		101	568350
103	65803		103	659994		102	68976		102	581367
104	59328		104	669973		103	64974		103	592418
105	60301		105	717706		104	66467		104	578831
106	63660		106	775962		105	63017		105	553109
107	60739		107	769428		106	54191		106	559533
108	54177		108	694879		107	50124		107	578325
109	52076		109	619730		108	51197		108	613019
110	60856		110	573798		109	52796		109	632865
111	64412		111	618478		110	52343		110	638310
112	67031		112	660223		111	52810		111	656282
113	69225		113	664278		112	60483		112	689351
114	73245		114	642725		113	71498		113	710335
115	79966		115	654831		114	75984		114	642618
116	89145		116	647847		115	73266		115	556711
117	99304		117	614635		116	66809		116	523156
118	103718		118	552312		117	60983		117	558055
119	100507		119	496712		118	59257		118	602311
120	96837		120	483263		119	63949		119	612211
121	93119		121	530725		120	75120		120	589391
122	88763		122	621413		121	87449		121	584383
123	82722		123	671553		122	96222		122	604425
124	86833		124	629882		123	95662		123	617901
125	98350		125	567797		124	82061		124	605593
126	105768		126	544110		125	64824		125	591088
127	98858		127	572844		126	53942		126	590886
128	88010		128	622673		127	57994		127	615398
129	76177		129	622875		128	72752		128	666414
130	68345		130	614772		129	91227		129	694768
131	62381		131	642708		130	98739		130	693073
132	59100		132	637547		131	92295		131	713998
133	64047		133	635860		132	81569		132	733042
134	74641		134	638753		133	75684		133	726221
135	87706		135	649771		134	75623		134	674388
136	90164		136	669745		135	78047		135	639045
137	87264		137	705063		136	85216		136	608476
138	80384		138	706130		137	96920		137	545476
139	74363		139	667440		138	103969		138	484360
140	69607		140	629920		139	104931		139	468538
141	67828		141	601132		140	102775		140	517076
142	68481		142	581953		141	99888		141	561383
143	71699		143	621852		142	102960		142	567512
144	71571		144	670582		143	102803		143	524456
145	66113		145	689217		144	90417		144	478882
146	58011		146	683098		145	76992		145	500803
147	57894		147	664173		146	66727		146	585647
148	67983		148	637386		147	63520		147	669146
149	81232		149	639477		148	67792		148	663091
150	90237		150	650254		149	67585		149	587935
151	96333		151	669403		150	63746		150	525759
152	94821		152	654396		151	60584		151	543906
153	85117		153	706296		152	58314		152	622875
154	74461		154	800557		153	51912		153	687656
155	62565		155	837048		154	46430		154	703666
156	52068		156	749946		155	49968		155	668689
157	47427		157	665767		156	58066		156	601406
158	58384		158	668616		157	64296		157	592446
159	74331		159	705109		158	65442		158	648198
160	88335		160	672114		159	53185		159	720582
161	91242		161	664267		160	41391		160	732271
162	85470		162	722163		161	43441		161	726323
163	70202		163	824707		162	52614		162	711611
164	55668		164	864902		163	67895		163	676191
165	49226		165	822311		164	82405		164	623342
166	56919		166	744001		165	91521		165	599128
167	74890		167	658574		166	87648		166	609377
168	92641		168	608945		167	77060		167	644029
169	96371		169	549722		168	70943		168	658149
170	84882		170	502767		169	67344		169	638251
171	74210		171	516767		170	63073		170	588792
172	76986		172	662009		171	59013		171	537293
173	85184		173	776513		172	62823		172	484860
174	91090		174	789657		173	73249		173	447104
175	76811		175	715045		174	76364		174	443320
176	67727		176	636904		175	65142		175	470628
177	70246		177	599959		176	56638		176	534816
178	77640		178	630215		177	60138		177	617484
179	73965		179	670118		178	61864		178	625569
180	63338		180	704437		179	60164		179	583668
181	58051		181	728610		180	56150		180	549871
182	65125		182	784941		181	48351		181	571733
183	92092		183	851532		182	42634		182	635321
184	112146		184	841774		183	44449		183	666176
185	119809		185	823533		184	51626		184	701784
186	107958		186	795839		185	60356		185	767107
187	91083		187	732067		186	63705		186	818588
188	79755		188	637975		187	61106		187	814184
189	72267		189	552164		188	62508		188	717431
190	65093		190	541313		189	72215		189	561813
191	57838		191	563921		190	80189		190	376076
192	52928		192	595960		191	79376		191	229992
193	54814		193	611054		192	74515		192	128230
194	66017		194	636142		193	81756		193	65217
195	76756		195	666771		194	90762		194	20869
196	67235		196	654515		195	88032		195	3932
197	47393		197	652065		196	77249		196	94
198	40089		198	633339		197	71149		197	13449
199	54205		199	594743		198	65929		198	66065
200	83753		200	548838		199	59827		199	164602
201	98226		201	558749		200	53757		200	240894
202	95178		202	570331		201	52611		201	260210
203	84776		203	587946		202	56427		202	240598
204	82511		204	635109		203	64334		203	283769
205	89455		205	662263		204	71350		204	378048
206	92918		206	651948		205	73080		205	474651
207	91058		207	611632		206	66664		206	533849
208	82146		208	535093		207	59999		207	594637
209	68649		209	416445		208	62585		208	680932
210	59311		210	309865		209	80512		209	727793
211	61001		211	295223		210	89716		210	728090
212	70580		212	396834		211	80285		211	648367
213	64653		213	573249		212	73445		212	570775
214	50281		214	694482		213	79948		213	550714
215	39464		215	755447		214	85311		214	578403
216	36330		216	745175		215	76714		215	652671
217	41240		217	656237		216	70545		216	697550
218	47623		218	555292		217	75322		217	708662
219	48993		219	496548		218	86990		218	674008
220	45282		220	518052		219	94201		219	568549
221	36568		221	601868		220	85284		220	458423
222	44208		222	671618		221	61568		221	408085
223	62662		223	693437		222	42272		222	468992
224	73936		224	629096		223	36541		223	569173
225	76493		225	562288		224	41266		224	630727
226	79319		226	544916		225	57926		225	652831
227	79897		227	571694		226	72861		226	590557
228	71054		228	586559		227	75381		227	475889
229	61733		229	574070		228	76252		228	481159
230	56870		230	558914		229	78099		229	553874
231	57813		231	551912		230	78706		230	615675
232	62359		232	564477		231	70564		231	607708
233	70512		233	634943		232	60681		232	575780
234	86478		234	696712		233	59302		233	556582
235	99465		235	725089		234	58937		234	632020
236	98247		236	692902		235	55139		235	739313
237	85690		237	643777		236	53879		236	801904
238	81627		238	640939		237	55605		237	770095
239	81186		239	666275		238	56042		238	720182
240	74527		240	673994		239	58861		239	662517
241	66689		241	625391		240	61460		240	597532
242	68149		242	591690		241	59575		241	572373
243	72092		243	601986		242	55941		242	556675
244	75828		244	643062		243	57580		243	536771
245	78182		245	699128		244	69410		244	544677
246	80343		246	705580		245	80703		245	638026
247	83159		247	668031		246	79152		246	723464
248	77096		248	591841		247	72645		247	761630
249	64026		249	523503		248	71892		248	701187
250	51257		250	455046		249	76924		249	627801
251	51745		251	487167		250	76747		250	568760
252	58538		252	592076		251	71604		251	492759
253	69523		253	735126		252	67606		252	428581
254	81797		254	774386		253	63651		253	435372
255	89326		255	775651		254	59310		254	519490
256	90598		256	785052		255	54251		255	619318
257	93893		257	754206		256	55048		256	702397
258	102170		258	654870		257	63850		257	726011
259	101047		259	596868		258	73656		258	706149
260	86756		260	616644		259	81447		259	653440
261	76914		261	666796		260	90626		260	618111
262	77257		262	678951		261	91408		261	619539
263	81131		263	704871		262	80011		262	612084
264	73238		264	738479		263	68495		263	583094
265	60656		265	735141		264	64061		264	548414
266	58517		266	701533		265	67391		265	506590
267	75649		267	697519		266	67379		266	467029
268	100510		268	737829		267	64875		267	415645
269	107796		269	766266		268	68389		268	392968
270	100230		270	700221		269	75581		269	409065
271	85040		271	606013		270	75796		270	460802
272	73038		272	579685		271	67282		271	493856
273	66391		273	585364		272	61171		272	499400
274	69061		274	574948		273	63406		273	501353
275	83641		275	557286		274	61618		274	525512
276	97534		276	573364		275	55297		275	541804
277	103204		277	607111		276	52881		276	514838
278	95720		278	679735		277	62689		277	504409
279	74105		279	757938		278	73005		278	519188
280	59577		280	748558		279	76116		279	556382
281	56473		281	718227		280	69475		280	562571
282	65623		282	740585		281	62054		281	570625
283	75740		283	763224		282	54779		282	597697
284	85342		284	779321		283	43858		283	638742
285	82848		285	753905		284	34985		284	663506
286	74125		286	641796		285	39166		285	681846
287	64678		287	528756		286	63421		286	684159
288	58610		288	493273		287	85171		287	663565
289	62018		289	565031		288	89000		288	635306
290	71437		290	666257		289	72874		289	629188
291	77686		291	720018		290	45848		290	624876
292	75153		292	697218		291	19678		291	639025
293	57144		293	648263		292	7267		292	652733
294	48327		294	630306		293	2275		293	633550
295	49403		295	662269		294	1105		294	563644
296	55531		296	689783		295	1685		295	495070
297	64028		297	666399		296	3175		296	475071
298	73774		298	610995		297	9896		297	496234
299	70948		299	575647		298	26832		298	511451
300	62999		300	615803		299	47323		299	540943
301	53803		301	695365		300	59778		300	580858
302	52591		302	783098		301	58992		301	614498
303	49721		303	820703		302	53310		302	645471
304	47126		304	839193		303	52335		303	665572
305	53216		305	812897		304	48696		304	695040
306	67246		306	733446		305	39074		305	705594
307	81166		307	588867		306	36382		306	699301
308	82671		308	489875		307	39251		307	664683
309	74073		309	501004		308	49921		308	628380
310	68091		310	569338		309	61487		309	575061
311	69709		311	622467		310	64342		310	472925
312	78394		312	604332		311	55941		311	350052
313	90407		313	593092		312	47668		312	306173
314	99553		314	596937		313	43618		313	392319
315	100084		315	620001		314	43779		314	530152
316	91419		316	621246		315	50800		315	652214
317	80549		317	524651		316	56199		316	663315
318	71329		318	418319		317	59070		317	603224
319	72192		319	415071		318	62652		318	562624
320	77317		320	529794		319	68515		319	554395
321	73633		321	627906		320	64421		320	560605
322	62689		322	663485		321	53221		321	560229
323	56281		323	631300		322	46073		322	561393
324	58571		324	621763		323	50206		323	530773
325	63110		325	605363		324	57567		324	475875
326	65645		326	588231		325	62926		325	440264
327	69209		327	630731		326	61203		326	435442
328	67863		328	687727		327	52896		327	439056
329	55108		329	736514		328	47663		328	432208
330	40152		330	802043		329	56151		329	432220
331	38404		331	897940		330	71546		330	499298
332	57825		332	919197		331	82271		331	584987
333	78149		333	897078		332	79648		332	635673
334	89283		334	854533		333	73823		333	574865
335	83618		335	734925		334	68095		334	487147
336	71759		336	583857		335	69164		335	428656
337	63100		337	486942		336	80974		336	430773
338	57443		338	485056		337	90840		337	470879
339	52670		339	515140		338	94732		338	508905
340	51801		340	524771		339	93298		339	521336
341	62979		341	481351		340	83053		340	535192
342	74013		342	467392		341	71778		341	559094
343	83571		343	581121		342	70006		342	570957
344	85652		344	720630		343	72887		343	592084
345	82704		345	771772		344	70465		344	606387
346	73907		346	783290		345	65961		345	613982
347	60282		347	830764		346	67166		346	644242
348	56623		348	799711		347	69228		347	688218
349	66041		349	781531		348	71097		348	721997
350	77004		350	756607		349	74910		349	733949
351	84877		351	702657		350	72132		350	681572
352	90229		352	608669		351	67144		351	626661
353	94692		353	566414		352	70483		352	572063
354	86579		354	551699		353	76766		353	533625
355	63625		355	563487		354	68516		354	517143
356	42871		356	671399		355	47809		355	530519
357	31921		357	752128		356	31140		356	551581
358	34832		358	757422		357	30941		357	536887
359	45913		359	667424		358	46562		358	526929
360	63221		360	615482		359	65679		359	509454
361	85043		361	590686		360	77921		360	508301
362	99219		362	558263		361	87658		361	515408
363	97343		363	502845		362	95177		362	583626
364	78883		364	536953		363	93247		363	673780
365	66619		365	635855		364	87216		364	733885
366	66375		366	741700		365	84773		365	692725
367	66483		367	768196		366	82539		366	590244
368	65147		368	736561		367	75641		367	523534
369	70825		369	723371		368	70332		368	512648
370	91927		370	695128		369	73602		369	535435
371	111635		371	651000		370	72355		370	563613
372	108266		372	622042		371	61555		371	586338
373	91447		373	634497		372	48892		372	632202
374	73454		374	658511		373	40789		373	687058
375	63574		375	674780		374	36382		374	704806
376	61645		376	672302		375	37297		375	684689
377	65820		377	652260		376	46649		376	665079
378	67886		378	626408		377	60633		377	655208
379	61370		379	605210		378	67163		378	629812
380	51802		380	615585		379	65730		379	613480
381	48617		381	584743		380	60414		380	597784
382	48826		382	485755		381	58990		381	573900
383	57230		383	396699		382	55723		382	533397
384	65167		384	468472		383	47398		383	512471
385	67244		385	617751		384	40040		384	487586
386	67127		386	675157		385	39365		385	402175
387	71446		387	628955		386	43993		386	313048
388	78936		388	544874		387	45385		387	346075
389	79197		389	544109		388	50116		388	451901
390	73795		390	573205		389	64922		389	561644
391	71911		391	576815		390	78083		390	639695
392	72771		392	556917		391	81134		391	678500
393	69359		393	549019		392	72603		392	641801
394	63082		394	538072		393	63370		393	548614
395	65252		395	498828		394	60108		394	476582
396	80740		396	484958		395	60527		395	472152
397	95549		397	535175		396	53810		396	539036
398	90586		398	626398		397	37379		397	586296
399	72732		399	768958		398	30730		398	599312
400	63008		400	855456		399	39555		399	598716
401	66894		401	831025		400	52847		400	621431
402	80301		402	779945		401	60678		401	653217
403	91628		403	722459		402	69675		402	676089
404	98383		404	676721		403	77680		403	670339
405	89581		405	644128		404	75106		404	616804
406	72819		406	636126		405	67257		405	593456
407	63232		407	668820		406	60838		406	617205
408	65499		408	697349		407	57370		407	686042
409	62387		409	700771		408	53806		408	746168
410	50869		410	665005		409	54227		409	715500
411	40651		411	649586		410	59301		410	609853
412	48450		412	680875		411	65577		411	523105
413	58286		413	694626		412	69077		412	469857
414	68377		414	651444		413	71057		413	495573
415	72132		415	632378		414	77201		414	552020
416	73529		416	684514		415	90334		415	602711
417	72220		417	659136		416	90227		416	581133
418	64493		418	562825		417	74712		417	486915
419	50058		419	509945		418	59834		418	397844
420	40164		420	499260		419	51279		419	371731
421	43079		421	533664		420	45426		420	399800
422	53067		422	624312		421	36818		421	478376
423	62878		423	692992		422	27207		422	529084
424	62459		424	730396		423	24156		423	528978
425	59793		425	750120		424	25913		424	517417
426	57036		426	710096		425	30690		425	563582
427	56313		427	659144		426	40769		426	630008
428	63161		428	690562		427	56802		427	602459
429	77322		429	761525		428	71752		428	535458
430	92657		430	761859		429	76323		429	488226
431	95011		431	750821		430	71512		430	518068
432	84993		432	792359		431	61595		431	560123
433	63421		433	821916		432	51686		432	569372
434	52903		434	755667		433	45275		433	495483
435	59303		435	674668		434	48666		434	435940
436	71537		436	579092		435	64790		435	447508
437	75362		437	543633		436	85172		436	523877
438	70141		438	550371		437	91690		437	623826
439	61435		439	562396		438	83426		438	673911
440	55720		440	562219		439	68914		439	640189
441	55700		441	583956		440	57814		440	582324
442	49311		442	558106		441	52775		441	603322
443	48000		443	456089		442	54383		442	638117
444	50118		444	385601		443	65322		443	626415
445	51209		445	465346		444	78885		444	568378
446	48354		446	577299		445	76842		445	514117
447	50437		447	607994		446	66869		446	519885
448	49444		448	567646		447	68034		447	560571
449	48918		449	567917		448	69022		448	576511
450	53497		450	641415		449	63107		449	522453
451	69268		451	743264		450	59502		450	455593
452	71937		452	749793		451	61001		451	467898
453	65059		453	687977		452	63469		452	531996
454	62951		454	644343		453	61143		453	603274
455	68803		455	649093		454	59172		454	631878
456	71294		456	709584		455	66717		455	606517
457	67194		457	700719		456	78269		456	589303
458	60302		458	628210		457	83756		457	578641
459	69500		459	531622		458	78045		458	620252
460	77501		460	471070		459	58221		459	661940
461	71482		461	463029		460	38860		460	699270
462	59373		462	537835		461	33050		461	695125
463	60586		463	629097		462	42372		462	697256
464	67975		464	656210		463	52944		463	734835
465	78544		465	600653		464	50644		464	726229
466	90101		466	585284		465	50369		465	658568
467	98168		467	632488		466	56302		466	555402
468	89047		468	674052		467	65055		467	539947
469	77849		469	661993		468	75357		468	587602
470	72590		470	652076		469	83020		469	603749
471	77096		471	679873		470	82586		470	563945
472	72490		472	698114		471	70635		471	491240
473	67320		473	658025		472	56249		472	432297
474	65024		474	568570		473	50583		473	397406
475	63154		475	476021		474	57485		474	406600
476	67269		476	367295		475	68722		475	487923
477	77720		477	320122		476	77342		476	516065
478	81485		478	386657		477	85760		477	500724
479	69726		479	550591		478	91885		478	505288
480	62264		480	662302		479	95525		479	588510
481	66014		481	654226		480	87142		480	689072
482	77482		482	568984		481	79666		481	702079
483	84479		483	479741		482	74463		482	661754
484	77027		484	442225		483	66153		483	587367
485	59150		485	445646		484	56228		484	516985
486	46493		486	520176		485	51967		485	498673
487	40407		487	572454		486	54516		486	503627
488	45964		488	624106		487	61029		487	525254
489	52162		489	688756		488	65441		488	484735
490	68693		490	765575		489	62899		489	448382
491	82958		491	803146		490	57033		490	456320
492	82652		492	758336		491	55271		491	503215
493	61531		493	700656		492	51350		492	563243
494	44035		494	631679		493	38446		493	575675
495	38696		495	569615		494	33648		494	568452
496	51478		496	542570		495	40621		495	563188
497	58004		497	556778		496	50764		496	557642
498	54632		498	599255		497	58471		497	549893
499	56028		499	616599		498	68121		498	547041
500	56117		500	574091		499	74206		499	561434
501	51647		501	525854		500	71199		500	615613
502	53832		502	522056		501	65595		501	653148
503	68190		503	577790		502	62598		502	641203
504	85319		504	608120		503	60662		503	582076
505	94719		505	626186		504	60173		504	574700
506	91302		506	679331		505	62829		505	634713
507	89228		507	693370		506	65192		506	650947
508	90356		508	692615		507	66437		507	607507
509	91320		509	686985		508	64455		508	553432
510	84578		510	734452		509	63720		509	508885
511	77872		511	744820		510	67509		510	516927
512	68964		512	694877		511	68579		511	577813
513	56717		513	609540		512	63359		512	644820
514	49867		514	556484		513	57535		513	690798
515	59674		515	626205		514	53881		514	685640
516	74688		516	765225		515	48038		515	686810
517	84458		517	836555		516	44006		516	685766
518	90939		518	796054		517	46087		517	691011
519	91626		519	715311		518	52858		518	709389
520	88802		520	683717		519	62460		519	722033
521	89089		521	678719		520	66556		520	689010
522	88605		522	688363		521	56737		521	630528
523	83385		523	687253		522	42181		522	576024
524	80115		524	670281		523	38885		523	505358
525	82234		525	617286		524	42524		524	434323
526	86287		526	549601		525	48461		525	408382
527	82888		527	578934		526	59863		526	442980
528	73414		528	625484		527	70900		527	494114
529	62463		529	618481		528	74544		528	515832
530	50456		530	552736		529	68298		529	530897
531	47632		531	526112		530	59779		530	543263
532	52036		532	575864		531	59193		531	540217
533	62596		533	604576		532	62143		532	495011
534	67190		534	601359		533	65047		533	465879
535	64777		535	604090		534	68593		534	465815
536	62052		536	596269		535	68826		535	483043
537	62751		537	569531		536	59669		536	549786
538	66672		538	494271		537	52130		537	666395
539	70676		539	433588		538	61950		538	735361
540	64568		540	473388		539	79905		539	717580
541	59977		541	593758		540	84445		540	649508
542	60705		542	700315		541	69917		541	589888
543	64999		543	703867		542	55660		542	550809
544	61008		544	643554		543	56353		543	545430
545	53478		545	615032		544	68933		544	553161
546	55544		546	621262		545	76593		545	538409
547	69405		547	631984		546	73361		546	508605
548	77495		548	628947		547	64896		547	553583
549	73136		549	619408		548	58263		548	617213
550	64246		550	647365		549	54162		549	675496
551	61655		551	696213		550	56478		550	683302
552	71533		552	690522		551	64110		551	659673
553	82342		553	603003		552	70582		552	656762
554	86640		554	520690		553	69477		553	699572
555	79659		555	497202		554	59765		554	758072
556	63459		556	558199		555	62067		555	734131
557	46687		557	644585		556	73668		556	676967
558	40328		558	729827		557	88227		557	638653
559	40633		559	724209		558	92850		558	621967
560	37812		560	632054		559	80786		559	601143
561	40849		561	551022		560	72742		560	573872
562	50449		562	566721		561	82883		561	587273
563	71494		563	598149		562	95869		562	627663
564	88335		564	582145		563	91415		563	644727
565	86605		565	572214		564	70763		564	602458
566	83960		566	569065		565	49882		565	496589
567	81330		567	598403		566	42998		566	457934
568	78447		568	583766		567	40277		567	522618
569	73709		569	532534		568	43962		568	673240
570	74802		570	456858		569	58559		569	745657
571	75713		571	404903		570	74653		570	722160
572	69358		572	462786		571	79318		571	605895
573	62169		573	654311		572	75477		572	503696
574	67086		574	797335		573	72610		573	476678
575	82795		575	818468		574	78157		574	520577
576	93637		576	732177		575	89614		575	614460
577	91334		577	696706		576	88476		576	689731
578	76284		578	720983		577	74850		577	639271
579	58018		579	812044		578	65385		578	568122
580	45161		580	872850		579	64265		579	545602
581	44510		581	845458		580	63471		580	584247
582	54439		582	755012		581	64361		581	652795
583	65798		583	688477		582	71650		582	686614
584	78189		584	661607		583	77520		583	638161
585	88081		585	612525		584	67551		584	561404
586	73329		586	590460		585	51682		585	539770
587	55488		587	610258		586	42527		586	574597
588	53229		588	627327		587	36000		587	614905
589	68063		589	638253		588	34071		588	647853
590	76813		590	662264		589	40681		589	676951
591	67563		591	685279		590	56009		590	739177
592	56529		592	671905		591	61259		591	812860
593	48755		593	613951		592	50340		592	844325
594	45491		594	531243		593	39640		593	826424
595	45474		595	442243		594	44327		594	730334
596	49319		596	358948		595	64287		595	623558
597	47959		597	348956		596	80293		596	559878
598	43215		598	351602		597	81440		597	575102
599	42561		599	364697		598	71747		598	580365
600	48316		600	416990		599	55975		599	559074
601	53019		601	518990		600	44991		600	557264
602	55149		602	614503		601	46247		601	581252
603	55830		603	643894		602	46871		602	602321
604	57564		604	611372		603	39986		603	619804
605	60036		605	565718		604	46345		604	637367
606	67773		606	490206		605	65503		605	653990
607	77990		607	423160		606	79581		606	660233
608	79174		608	444100		607	84569		607	645622
609	66860		609	547617		608	81548		608	570565
610	54598		610	649605		609	76580		609	458662
611	53547		611	715478		610	68396		610	414271
612	67581		612	720818		611	51241		611	459155
613	83074		613	643276		612	40382		612	545591
614	89857		614	559662		613	41518		613	604815
615	82703		615	500998		614	44977		614	595148
616	62283		616	525927		615	51180		615	573299
617	57380		617	639862		616	68458		616	583271
618	67370		618	707451		617	87712		617	607786
619	80707		619	745026		618	95431		618	586755
620	76342		620	753294		619	89891		619	534258
621	69968		621	697718		620	79827		620	496086
622	63686		622	564925		621	68795		621	449896
623	59862		623	437697		622	66127		622	397912
624	54586		624	403043		623	69655		623	373341
625	57574		625	550910		624	70379		624	378634
626	58027		626	783178		625	53947		625	434669
627	54541		627	918653		626	33431		626	505174
628	50291		628	898564		627	21881		627	534283
629	48356		629	778651		628	24412		628	477982
630	44246		630	680124		629	28239		629	434704
631	44461		631	587626		630	36046		630	454972
632	55116		632	538264		631	48411		631	542958
633	70941		633	520474		632	57462		632	620353
634	85623		634	546374		633	57485		633	670605
635	98730		635	571186		634	50368		634	679113
636	110236		636	593465		635	41797		635	688408
637	97493		637	654422		636	38524		636	646704
638	77147		638	725491		637	46255		637	589381
639	63830		639	765147		638	57278		638	552295
640	75316		640	751832		639	57051		639	584714
641	86713		641	748518		640	48107		640	642435
642	78224		642	751091		641	37094		641	677368
643	68271		643	723153		642	37411		642	682485
644	68653		644	642375		643	45640		643	651160
645	79543		645	513190		644	51378		644	627929
646	91084		646	477336		645	52462		645	625833
647	105746		647	529151		646	56258		646	626893
648	108229		648	653719		647	64295		647	638846
649	97698		649	725947		648	68857		648	667645
650	83560		650	688626		649	67634		649	683010
651	73717		651	589363		650	57021		650	671713
652	67849		652	532538		651	54900		651	645900
653	67377		653	534762		652	62268		652	650503
654	65446		654	594823		653	67773		653	666704
655	57756		655	690770		654	68972		654	646121
656	53729		656	759413		655	67807		655	615870
657	50855		657	728319		656	61941		656	586232
658	43139		658	627518		657	54940		657	566984
659	37164		659	562959		658	47610		658	546371
660	36845		660	554326		659	41491		659	536292
661	43053		661	582013		660	38414		660	518128
662	53087		662	643246		661	39085		661	464083
663	64809		663	735928		662	50086		662	431028
664	73717		664	754289		663	68234		663	456936
665	82184		665	721221		664	83439		664	510290
666	90144		666	637507		665	76922		665	534587
667	94456		667	642196		666	58411		666	527440
668	81246		668	723034		667	53555		667	536793
669	59901		669	752453		668	67098		668	580967
670	45781		670	713264		669	80306		669	624539
671	52593		671	623603		670	85329		670	600769
672	61292		672	574955		671	79875		671	521164
673	65188		673	600860		672	68558		672	459405
674	68607		674	682359		673	55067		673	466756
675	81012		675	750969		674	44959		674	494812
676	101045		676	798625		675	42271		675	516072
677	112141		677	795178		676	47595		676	511935
678	114343		678	679772		677	56225		677	470409
679	98705		679	568334		678	63936		678	449156
680	86040		680	518251		679	64621		679	450769
681	77826		681	532496		680	54569		680	450017
682	78071		682	581167		681	37545		681	394938
683	80615		683	586160		682	21973		682	378691
684	81262		684	580561		683	10522		683	440009
685	78376		685	626084		684	7362		684	499057
686	72583		686	749979		685	12541		685	484811
687	64080		687	791180		686	19295		686	416418
688	54638		688	791340		687	35121		687	395853
689	51518		689	732846		688	54414		688	444103
690	52348		690	679913		689	67829		689	525055
691	52948		691	682681		690	76298		690	575140
692	46955		692	721677		691	79514		691	550556
693	29800		693	738263		692	71636		692	489200
694	19045		694	691789		693	54278		693	431217
695	18557		695	631301		694	43261		694	427233
696	31572		696	649564		695	47067		695	497552
697	46283		697	718637		696	55258		696	587545
698	54698		698	690172		697	58509		697	625517
699	55827		699	567363		698	58992		698	633584
700	58068		700	479474		699	61908		699	623221
701	72865		701	511762		700	69048		700	625260
702	76198		702	578090		701	78062		701	622987
703	67755		703	624083		702	85101		702	625038
704	59632		704	606579		703	89901		703	639409
705	62146		705	594128		704	92629		704	655542
706	62770		706	653648		705	85698		705	705589
707	58184		707	688182		706	71855		706	729544
708	58956		708	680867		707	56726		707	691966
709	70838		709	674937		708	49396		708	592752
710	82708		710	673117		709	47356		709	510818
711	97832		711	618449		710	40864		710	451265
712	110881		712	546950		711	31740		711	460703
713	98008		713	515766		712	31103		712	504121
714	70756		714	525406		713	44401		713	539912
715	53372		715	598025		714	50599		714	585422
716	53100		716	648171		715	46221		715	635656
717	62220		717	659673		716	46638		716	678423
718	61839		718	633739		717	56582		717	644556
719	53773		719	559592		718	68778		718	543498
720	45587		720	543851		719	74069		719	436433
721	49269		721	640717		720	74262		720	422822
722	63276		722	730226		721	71293		721	466323
723	73491		723	748710		722	65038		722	554574
724	78108		724	703890		723	63808		723	649904
725	77672		725	677348		724	69885		724	716450
726	78743		726	671997		725	74024		725	724961
727	75894		727	690185		726	76867		726	693399
728	70337		728	701104		727	84259		727	625943
729	63659		729	653368		728	95203		728	537212
730	65608		730	611993		729	101314		729	472151
731	66304		731	572988		730	97085		730	470576
732	65245		732	445153		731	80774		731	512520
733	67022		733	327756		732	61747		732	528085
734	65204		734	291302		733	50920		733	505713
735	63934		735	388527		734	52865		734	454302
736	60493		736	558177		735	59476		735	374347
737	62087		737	615497		736	61669		736	347132
738	76684		738	587911		737	64456		737	380938
739	86780		739	549033		738	67181		738	461398
740	84303		740	522375		739	65510		739	519172
741	81042		741	533155		740	65328		740	549809
742	73062		742	572954		741	71219		741	542128
743	56470		743	626509		742	77000		742	548026
744	43138		744	627699		743	78541		743	569268
745	43396		745	614911		744	76264		744	616800
746	60193		746	650404		745	67818		745	641205
747	82374		747	753209		746	56408		746	649045
748	89974		748	821189		747	50066		747	609638
749	84505		749	793941		748	43852		748	514976
750	65936		750	725816		749	34356		749	420228
751	42318		751	706007		750	32415		750	390208
752	35235		752	721060		751	41537		751	403334
753	36604		753	724208		752	53064		752	439178
754	36750		754	725768		753	64874		753	487556
755	43080		755	725284		754	77214		754	584327
756	53622		756	730814		755	88596		755	706787
757	70291		757	736793		756	93327		756	800808
758	81822		758	735632		757	88168		757	812734
759	82961		759	730137		758	78933		758	753602
760	81196		760	708548		759	67964		759	604240
761	82598		761	638977		760	60246		760	465046
762	77319		762	554453		761	56807		761	378800
763	63543		763	555751		762	58061		762	438149
764	46793		764	657044		763	55883		763	547392
765	42943		765	745998		764	52347		764	644789
766	41691		766	768528		765	55467		765	683544
767	42524		767	715925		766	66036		766	705112
768	45636		768	650148		767	71890		767	704424
769	54393		769	628685		768	65708		768	676795
770	59977		770	653165		769	56495		769	602692
771	63316		771	693405		770	53007		770	522030
772	71193		772	718291		771	55491		771	487723
773	80346		773	720309		772	60054		772	483558
774	79847		774	710142		773	67368		773	480157
775	71195		775	709668		774	74388		774	496285
776	62070		776	731198		775	74773		775	515647
777	69660		777	745205		776	73241		776	546560
778	78689		778	766487		777	80688		777	574146
779	76083		779	789347		778	89702		778	566189
780	57618		780	825301		779	85390		779	511275
781	44276		781	794944		780	75044		780	453646
782	44319		782	734237		781	68590		781	430900
783	60340		783	699090		782	69777		782	481007
784	75274		784	679983		783	76969		783	562804
785	84755		785	644515		784	79100		784	585628
786	88653		786	616828		785	71502		785	530348
787	84986		787	579566		786	60720		786	452132
788	69640		788	551068		787	48122		787	425281
789	48691		789	552563		788	33213		788	456436
790	40646		790	613086		789	22112		789	514153
791	41275		791	664716		790	27368		790	560815
792	49358		792	685820		791	46070		791	568218
793	56166		793	725607		792	68410		792	533347
794	60191		794	760113		793	73515		793	481317
795	60586		795	764880		794	64456		794	474002
796	63942		796	790823		795	54386		795	522686
797	70155		797	800212		796	49316		796	572410
798	64200		798	748295		797	50128		797	553461
799	58204		799	636272		798	60093		798	512453
800	54856		800	528342		799	76561		799	496820
801	58932		801	489522		800	88532		800	516500
802	68024		802	510998		801	89930		801	560177
803	74853		803	517526		802	78746		802	590783
804	79185		804	474120		803	63046		803	608343
805	82564		805	478113		804	57145		804	595134
806	73635		806	541538		805	54735		805	617766
807	62202		807	637640		806	50091		806	668680
808	55337		808	717943		807	53344		807	700100
809	54923		809	727060		808	59389		808	683666
810	51733		810	695346		809	61437		809	689720
811	48198		811	621334		810	63652		810	692874
812	50682		812	562602		811	62354		811	684498
813	58640		813	557704		812	62335		812	632749
814	70369		814	576706		813	72168		813	575195
815	79898		815	605079		814	88417		814	563534
816	84052		816	641868		815	101647		815	601583
817	75958		817	629039		816	100967		816	579672
818	65266		818	558402		817	86503		817	543828
819	60539		819	490021		818	66607		818	497786
820	67125		820	480997		819	57384		819	470199
821	71999		821	522111		820	59233		820	532743
822	75403		822	590057		821	61694		821	663101
823	74165		823	650911		822	56057		822	711076
824	74570		824	718084		823	49866		823	627577
825	74667		825	769105		824	49159		824	467498
826	76735		826	757140		825	51700		825	386629
827	80309		827	727967		826	55365		826	362207
828	87077		828	721351		827	60122		827	363138
829	88918		829	719678		828	62344		828	379479
830	84845		830	656078		829	60462		829	426184
831	80629		831	566299		830	59933		830	527588
832	83743		832	520235		831	62301		831	592105
833	92521		833	500247		832	62111		832	582865
834	90639		834	501702		833	55688		833	518620
835	77497		835	569212		834	52452		834	464073
836	66470		836	705286		835	61406		835	440323
837	72553		837	826617		836	75193		836	462100
838	83811		838	840900		837	80072		837	515515
839	86378		839	782082		838	73003		838	586070
840	82280		840	691672		839	63573		839	661786
841	70167		841	607136		840	59994		840	689854
842	65175		842	565826		841	57957		841	635312
843	69994		843	542899		842	56505		842	575724
844	82598		844	509402		843	54529		843	562754
845	101668		845	495232		844	54083		844	608442
846	109573		846	552148		845	53271		845	657613
847	108126		847	602008		846	49410		846	668187
848	91261		848	664292		847	43469		847	601611
849	73131		849	687436		848	38993		848	502021
850	73361		850	646599		849	29416		849	446575
851	86387		851	539832		850	16591		850	504323
852	92928		852	452009		851	6595		851	548807
853	84785		853	437361		852	3046		852	595756
854	75219		854	532274		853	7513		853	640501
855	77181		855	603400		854	14248		854	647741
856	86289		856	614532		855	30482		855	628963
857	91880		857	560576		856	56358		856	619987
858	88762		858	521200		857	79327		857	617681
859	83341		859	541913		858	89378		858	608367
860	79784		860	604133		859	88955		859	605855
861	76434		861	665521		860	83654		860	587516
862	73191		862	718692		861	71371		861	517174
863	77182		863	741540		862	61537		862	501465
864	81625		864	719276		863	59781		863	541311
865	69909		865	653077		864	57568		864	518866
866	46027		866	595622		865	51909		865	479555
867	26248		867	597568		866	48352		866	460054
868	29424		868	634584		867	51390		867	451951
869	44361		869	651075		868	54340		868	424870
870	62023		870	688125		869	51335		869	416980
871	60890		871	693142		870	44599		870	442734
872	59365		872	701928		871	35490		871	528424
873	63798		873	743118		872	29379		872	595010
874	73427		874	822351		873	40573		873	616391
875	77933		875	864185		874	58716		874	573660
876	64285		876	864492		875	77626		875	473594
877	47422		877	806202		876	88425		876	428045
878	39497		878	719778		877	88728		877	441606
879	58633		879	689662		878	81608		878	494012
880	69794		880	692832		879	75091		879	558589
881	70749		881	733030		880	74801		880	585702
882	65325		882	797629		881	78817		881	580995
883	58414		883	791773		882	78395		882	558727
884	60057		884	694382		883	76218		883	552678
885	69732		885	544879		884	76963		884	571929
886	85630		886	432970		885	81320		885	609405
887	97423		887	504771		886	87000		886	663682
888	100047		888	616498		887	73817		887	706760
889	97747		889	672074		888	49457		888	702085
890	87918		890	658584		889	35283		889	635789
891	75364		891	647739		890	43997		890	575023
892	71846		892	656054		891	58490		891	514568
893	75317		893	610246		892	68115		892	478912
894	78621		894	532974		893	71976		893	473042
895	74430		895	533785		894	70726		894	514797
896	74426		896	638355		895	64254		895	605923
897	75648		897	779554		896	58764		896	637726
898	71594		898	867656		897	57465		897	656904
899	61933		899	819183		898	60735		898	661382
900	57144		900	757564		899	58327		899	700184
901	52946		901	726245		900	50467		900	749916
902	46853		902	715729		901	51330		901	753272
903	44193		903	684139		902	63281		902	714848
904	44222		904	631940		903	82438		903	627916
905	33011		905	608711		904	95989		904	559427
906	22564		906	594386		905	97015		905	505531
907	23003		907	564935		906	88974		906	480111
908	41415		908	532839		907	79342		907	480726
909	58732		909	501763		908	74757		908	463473
910	69230		910	499571		909	75864		909	466012
911	74523		911	546888		910	80286		910	444846
912	82543		912	598769		911	81840		911	404417
913	73531		913	621399		912	80573		912	357209
914	55016		914	602979		913	77966		913	384279
915	43563		915	562689		914	75325		914	457477
916	52346		916	530041		915	67641		915	545559
917	60060		917	507754		916	59471		916	567602
918	64024		918	494849		917	55371		917	554838
919	64433		919	520854		918	56386		918	531475
920	69321		920	557965		919	65304		919	505230
921	74677		921	608883		920	70692		920	495332
922	78880		922	641240		921	67190		921	609836
923	81300		923	610870		922	61821		922	750548
924	81202		924	559137		923	58077		923	820778
925	73872		925	522677		924	56381		924	776984
926	66634		926	541403		925	52350		925	673391
927	63306		927	657406		926	48710		926	591290
928	57133		928	721732		927	52575		927	535260
929	49946		929	713966		928	59472		928	491179
930	52363		930	634857		929	72387		929	470878
931	62957		931	617701		930	82107		930	535295
932	75797		932	672237		931	75291		931	645425
933	75626		933	721810		932	49840		932	716216
934	72913		934	730438		933	29047		933	701727
935	70516		935	722482		934	34354		934	611088
936	78833		936	660287		935	51543		935	572609
937	93961		937	607137		936	52231		936	562600
938	97154		938	581234		937	43074		937	538482
939	84061		939	539328		938	45180		938	497022
940	70788		940	522194		939	53079		939	474669
941	71397		941	486539		940	58759		940	481970
942	81713		942	490992		941	65360		941	523477
943	83981		943	536034		942	76259		942	550884
944	82887		944	621461		943	84334		943	523278
945	84731		945	649561		944	80029		944	480101
946	88704		946	643047		945	64483		945	478196
947	81607		947	617477		946	47476		946	561023
948	71479		948	581193		947	43512		947	635436
949	66406		949	512887		948	43718		948	664755
950	65629		950	452167		949	46486		949	634135
951	68687		951	475232		950	54619		950	595934
952	73263		952	557492		951	63412		951	561186
953	77166		953	623018		952	66721		952	572721
954	72695		954	640071		953	67806		953	608764
955	52983		955	607726		954	70591		954	602357
956	35920		956	602366		955	72012		955	537380
957	23989		957	617637		956	70331		956	524452
958	30257		958	641429		957	70812		957	602039
959	49961		959	654608		958	71218		958	663538
960	73237		960	638187		959	73061		959	671216
961	88970		961	594675		960	75320		960	631019
962	97930		962	571115		961	78389		961	589226
963	97313		963	588821		962	78723		962	559562
964	86171		964	642035		963	73489		963	563775
965	75862		965	694213		964	65811		964	586425
966	67732		966	707242		965	62367		965	614121
967	57756		967	720369		966	62340		966	666090
968	50309		968	706684		967	60624		967	699818
969	35010		969	642291		968	61247		968	754883
970	26575		970	555995		969	57509		969	771562
971	27165		971	502917		970	49038		970	748969
972	45217		972	496579		971	41820		971	636517
973	51516		973	526279		972	34184		972	484535
974	50153		974	574891		973	29951		973	413386
975	50907		975	608245		974	36907		974	398372
976	60501		976	621701		975	52549		975	436578
977	72448		977	653546		976	60973		976	489967
978	79736		978	694033		977	64612		977	520825
979	85367		979	714175		978	67716		978	518868
980	94694		980	690226		979	66608		979	515241
981	98777		981	664721		980	62830		980	549165
982	88839		982	650053		981	61262		981	581581
983	76308		983	648691		982	56684		982	613468
984	82035		984	689105		983	56883		983	627864
985	101027		985	776251		984	69700		984	594753
986	98618		986	819896		985	82293		985	572946
987	83763		987	818415		986	81153		986	552485
988	67383		988	774010		987	71842		987	531410
989	66523		989	725112		988	64472		988	519459
990	68386		990	679521		989	59651		989	597146
991	67189		991	624607		990	55548		990	722221
992	57034		992	639549		991	57650		991	835410
993	44867		993	740308		992	67929		992	866719
994	39833		994	788731		993	75370		993	853207
995	43696		995	737072		994	67418		994	822395
996	57326		996	611579		995	51693		995	797774
997	76468		997	621581		996	41939		996	817759
998	90564		998	708882		997	45893		997	833441
999	91567		999	783619		998	62821		998	801733
1000	86590		1000	769589		999	83060		999	725440
1001	81503		1001	739274		1000	92710		1000	631502
1002	75806		1002	714192		1001	87657		1001	594386
1003	76555		1003	673410		1002	79347		1002	612884
1004	81104		1004	624436		1003	73612		1003	644601
1005	86649		1005	619531		1004	71186		1004	657732
1006	88196		1006	648178		1005	71584		1005	674680
1007	90543		1007	709257		1006	71205		1006	681458
1008	96228		1008	745698		1007	74495		1007	675865
1009	96358		1009	730475		1008	81428		1008	659926
1010	87290		1010	702750		1009	84214		1009	618324
1011	73875		1011	684662		1010	78490		1010	566703
1012	63603		1012	677877		1011	62609		1011	486195
1013	53956		1013	705038		1012	45884		1012	428287
1014	46830		1014	742170		1013	39829		1013	386326
1015	52980		1015	716249		1014	41458		1014	408608
1016	59636		1016	667454		1015	49685		1015	454877
1017	65039		1017	623156		1016	61060		1016	483165
1018	65283		1018	600658		1017	65673		1017	504051
1019	61989		1019	606419		1018	64028		1018	526389
1020	57957		1020	631467		1019	61213		1019	553228
1021	57709		1021	629279		1020	60136		1020	581765
1022	61801		1022	591360		1021	62964		1021	609210
1023	66842		1023	541544		1022	70014		1022	652751
1024	70453		1024	529900		1023	77471		1023	661205
1025	68389		1025	577183		1024	79556		1024	650647
1026	64236		1026	598077		1025	73401		1025	621076
1027	66869		1027	609146		1026	66612		1026	624557
1028	75558		1028	628664		1027	61506		1027	643143
1029	79596		1029	657545		1028	61980		1028	679369
1030	82550		1030	649031		1029	65911		1029	678058
1031	84868		1031	627755		1030	65496		1030	651332
1032	80962		1032	616878		1031	57003		1031	624720
1033	72108		1033	625326		1032	49620		1032	618069
1034	67300		1034	647811		1033	54947		1033	657834
1035	64321		1035	634801		1034	65809		1034	704142
1036	58823		1036	606154		1035	65262		1035	709044
1037	60186		1037	590134		1036	59536		1036	666744
1038	68733		1038	630605		1037	53982		1037	601928
1039	81257		1039	656946		1038	50346		1038	543630
1040	88216		1040	645498		1039	49717		1039	527279
1041	88080		1041	635707		1040	57544		1040	564635
1042	83359		1042	629765		1041	66862		1041	617840
1043	72644		1043	610242		1042	73664		1042	671066
1044	63744		1044	583033		1043	81263		1043	708350
1045	70691		1045	588498		1044	83803		1044	727514
1046	88014		1046	644721		1045	79372		1045	713031
1047	105553		1047	685796		1046	67696		1046	682920
1048	106463		1048	695143		1047	62343		1047	649684
1049	93619		1049	622106		1048	67310		1048	611197
1050	80230		1050	536564		1049	77396		1049	588133
1051	78953		1051	491118		1050	82658		1050	583228
1052	83175		1052	493931		1051	85252		1051	589683
1053	85962		1053	532788		1052	84785		1052	612395
1054	84437		1054	524141		1053	82196		1053	647317
1055	80922		1055	523078		1054	78683		1054	661773
1056	78929		1056	494562		1055	76280		1055	655559
1057	76493		1057	504734		1056	80532		1056	620624
1058	71278		1058	538008		1057	80796		1057	600995
1059	69834		1059	562185		1058	70713		1058	591472
1060	71218		1060	576695		1059	63022		1059	603150
1061	69758		1061	576003		1060	68263		1060	594566
1062	66292		1062	561118		1061	74806		1061	576119
1063	66061		1063	532591		1062	69024		1062	524919
1064	70498		1064	528621		1063	57796		1063	482643
1065	77007		1065	577876		1064	57389		1064	446032
1066	80667		1066	647306		1065	58398		1065	439175
1067	81356		1067	677058		1066	54751		1066	452335
1068	79914		1068	666297		1067	54526		1067	489533
1069	76019		1069	597547		1068	62739		1068	520676
1070	70615		1070	503666		1069	76918		1069	493708
1071	70762		1071	405753		1070	83473		1070	454118
1072	73678		1072	378863		1071	81107		1071	446855
1073	75980		1073	385105		1072	73029		1072	489023
1074	65114		1074	369353		1073	64070		1073	552923
1075	55144		1075	383610		1074	53865		1074	617059
1076	54208		1076	423514		1075	53239		1075	654674
1077	61760		1077	454208		1076	58526		1076	661709
1078	72958		1078	487884		1077	67575		1077	684677
1079	73582		1079	522274		1078	72911		1078	710114
1080	74987		1080	572161		1079	70321		1079	723146
1081	85632		1081	636540		1080	61693		1080	715233
1082	95867		1082	671905		1081	54669		1081	689108
1083	96326		1083	672243		1082	53956		1082	669793
1084	86794		1084	632881		1083	57087		1083	669897
1085	79978		1085	619397		1084	60736		1084	698803
1086	80755		1086	637410		1085	67458		1085	716932
1087	87076		1087	654389		1086	78680		1086	699034
1088	85828		1088	633433		1087	89066		1087	672163
1089	77612		1089	581597		1088	96016		1088	631220
1090	60156		1090	547235		1089	91278		1089	600599
1091	56666		1091	553661		1090	80706		1090	563769
1092	61442		1092	585896		1091	73214		1091	546524
1093	63825		1093	641204		1092	65163		1092	553269
1094	63551		1094	668694		1093	61142		1093	593300
1095	52794		1095	673490		1094	72465		1094	628202
1096	53476		1096	634023		1095	85277		1095	638399
1097	58834		1097	585410		1096	86130		1096	654996
1098	63597		1098	563910		1097	78629		1097	694124
1099	65464		1099	593401		1098	72307		1098	738875
1100	63065		1100	613665		1099	66265		1099	777589
1101	60328		1101	626886		1100	59882		1100	781160
1102	57193		1102	640133		1101	54824		1101	746911
1103	57801		1103	694487		1102	52369		1102	707375
1104	60983		1104	734654		1103	51813		1103	649335
1105	58004		1105	758061		1104	57427		1104	584855
1106	55536		1106	783539		1105	71281		1105	526848
1107	58245		1107	862563		1106	87908		1106	510866
1108	61403		1108	912380		1107	94940		1107	538371
1109	63646		1109	920079		1108	94883		1108	570563
1110	66502		1110	879570		1109	83487		1109	553388
1111	66181		1111	848421		1110	69915		1110	488900
1112	68092		1112	839062		1111	59340		1111	473944
1113	66202		1113	805038		1112	56700		1112	525412
1114	59985		1114	700526		1113	61485		1113	589100
1115	51892		1115	496061		1114	69666		1114	611058
1116	58314		1116	321123		1115	70465		1115	621394
1117	71150		1117	181789		1116	61178		1116	643082
1118	82259		1118	74208		1117	51681		1117	644204
1119	84152		1119	29253		1118	51069		1118	617190
1120	72549		1120	91926		1119	63063		1119	569517
1121	52129		1121	246857		1120	79654		1120	554371
1122	41832		1122	412210		1121	90515		1121	557356
1123	42580		1123	542570		1122	92140		1122	570795
1124	53672		1124	590305		1123	96099		1123	583095
1125	66403		1125	627279		1124	100478		1124	615436
1126	80006		1126	642496		1125	97874		1125	648910
1127	83232		1127	665072		1126	88852		1126	658530
1128	83648		1128	664240		1127	78725		1127	650521
1129	84674		1129	671081		1128	70996		1128	693790
1130	85586		1130	716047		1129	66177		1129	752754
1131	88481		1131	758610		1130	65806		1130	782644
1132	92845		1132	766603		1131	66326		1131	698121
1133	92523		1133	735571		1132	66552		1132	615972
1134	92649		1134	713405		1133	67043		1133	563957
1135	89125		1135	752651		1134	64388		1134	557739
1136	90665		1136	853019		1135	59696		1135	550595
1137	91464		1137	877038		1136	59107		1136	539341
1138	93882		1138	767861		1137	65933		1137	543107
1139	87852		1139	492975		1138	73919		1138	549331
1140	65860		1140	200983		1139	76592		1139	580685
1141	31489		1141	58868		1140	75801		1140	664535
1142	4260		1142	48136		1141	71077		1141	731930
1143	0		1143	49590		1142	65743		1142	744087
						1143	61906		1143	703094
						1144	58662		1144	667650
						1145	58130		1145	664952
						1146	60592		1146	663439
						1147	60742		1147	640970
						1148	61818		1148	596971
						1149	70370		1149	564212
						1150	81333		1150	551713
						1151	90571		1151	558559
						1152	94588		1152	602998
						1153	95813		1153	686840
						1154	95735		1154	748687
						1155	89946		1155	773622
						1156	80390		1156	739137
						1157	72562		1157	714188
						1158	73742		1158	690238
						1159	83225		1159	721075
						1160	97202		1160	808122
						1161	113085		1161	899913
						1162	130391		1162	966520
						1163	144478		1163	1042024
						1164	149536		1164	1178165
						1165	134727		1165	1263695
						1166	97981		1166	1083617
						1167	47578		1167	658281
						1168	9004		1168	248549
						1169	0		1169	91036
									1170	81314
									1171	114443
									1172	118902
									1173	109996
									1174	89432
									1175	49814
									1176	23852
									1177	40760
									1178	71359
									1179	92545
									1180	100543
									1181	93000
