# Supplementary material for: Experimental Aqueous Alteration of Cortical Bone Microarchitecture Analyzed by Quantitative Micro-Computed Tomography
Source: Frontiers journal article supplement (doi:10.3389/feart.2021.609496), 2021-04-22
Supplement: Data_Sheet_6.xlsx [file Data_Sheet_6.xlsx]

## Sheet: 30°C FW Ca.Dm distribution
Supplementary Material S6
		before				after				difference
St.Th	St.Th	FW 30°C 1d	FW 30°C 14d	FW 30°C 30d		FW 30°C 1d	FW 30°C 14d	FW 30°C 30d		FW 30°C 1d	FW 30°C 14d	FW 30°C 30d
Mid-range	Mid-range	Percent volume in range				Percent volume in range				Percent volume in range
µm	mm	%				%				%
6	0.006	31.3874	28.5372	31.9773		22.8137	21.7686	22.0283		-8.5737	-6.7686	-9.949
12	0.012	11.173	20.9902	12.4803		12.9744	21.5511	15.6404		1.8014	0.5609	3.1601
18	0.018	15.0645	20.7717	17.2901		18.6813	22.8676	20.8076		3.6168	2.0959	3.5175
24	0.024	19.5532	17.1307	17.5562		22.5593	19.627	20.4426		3.0061	2.4963	2.8864
30	0.03	12.8412	7.6986	8.9971		13.4878	8.9788	9.7776		0.6466	1.2802	0.7805
36	0.036	5.6523	3.018	3.9728		5.6108	3.2806	4.325		-0.0415	0.2626	0.3522
42	0.042	2.7639	1.3885	2.7317		2.5106	1.4248	2.679		-0.2533	0.0363	-0.0527
48	0.048	1.0302	0.2653	1.7079		0.972	0.3628	1.6498		-0.0582	0.0975	-0.0581
54	0.054	0.3904	0.0952	0.9053		0.2413	0.08	0.9598		-0.1491	-0.0152	0.0545
60	0.06	0.1441	0.074	0.7081		0.1269	0.0586	0.594		-0.0172	-0.0154	-0.1141
66	0.066		0.0306	0.6769		0.022		0.5388		0.022	-0.0306	-0.1381
72	0.072			0.5216				0.3705				-0.1511
78	0.078			0.3052				0.1344				-0.1708
84	0.084			0.0501				0.0523				0.0022
90	0.09			0.1194								-0.1194
96	0.096
102	0.102
108	0.108
114	0.114
120	0.12
126	0.126
132	0.132
138	0.138
144	0.144
150	0.15
156	0.156
162	0.162
168	0.168
174	0.174
180	0.18

## Sheet: 60°C FW Ca.Dm distribution
Supplementary Material S6
		before							after							difference
St.Th	St.Th	FW 60°C 1d	FW 60°C 3d	FW 60°C 7d	FW 60°C 21d	FW 60°C 14d	FW 60°C 30d		FW 60°C 1d	FW 60°C 3d	FW 60°C 7d	FW 60°C 14d	FW 60°C 21d	FW 60°C 30d		FW 60°C 1d	FW 60°C 3d	FW 60°C 7d	FW 60°C 14d	FW 60°C 21d	FW 60°C 30d
Mid-range	Mid-range	Percent volume in range							Percent volume in range							Percent volume in range
µm	mm	%							%							%
6	0.006	20.8146	31.3191	12.2489	4.9658	18.2521	23.3975		26.0553	33.9518	23.1734	23.9283	26.7287	35.8928		5.2407	2.6327	10.9245	18.9625	8.4766	12.4953
12	0.012	31.5933	29.0351	13.8322	19.6844	19.2841	41.4986		26.6867	26.9044	10.8705	15.8667	17.5522	33.4359		-4.9066	-2.1307	-2.9617	-3.8177	-1.7319	-8.0627
18	0.018	24.2634	20.2637	19.6547	20.8776	23.7014	20.7074		21.6832	19.0645	15.3411	15.2828	21.0674	16.6063		-2.5802	-1.1992	-4.3136	-5.5948	-2.634	-4.1011
24	0.024	15.7703	13.2597	22.7984	24.5136	21.8214	9.9665		16.2135	13.3719	19.7126	18.797	19.3248	9.4622		0.4432	0.1122	-3.0858	-5.7166	-2.4966	-0.5043
30	0.03	5.2982	4.4286	15.5643	16.7524	10.3285	2.9455		6.3228	4.8583	14.3115	13.7766	9.5417	3.0111		1.0246	0.4297	-1.2528	-2.9758	-0.7868	0.0656
36	0.036	1.3739	1.2835	7.6431	7.8285	3.8368	0.9099		1.817	1.3833	7.6969	6.9348	3.4114	0.8429		0.4431	0.0998	0.0538	-0.8937	-0.4254	-0.067
42	0.042	0.6193	0.3699	4.1534	3.5866	1.845	0.4364		0.73	0.3792	4.5459	3.4633	1.5809	0.5051		0.1107	0.0093	0.3925	-0.1233	-0.2641	0.0687
48	0.048	0.1725	0.0404	1.9289	0.8713	0.6118	0.1381		0.2502	0.0469	1.9301	0.9348	0.5446	0.2437		0.0777	0.0065	0.0012	0.0635	-0.0672	0.1056
54	0.054	0.0758		0.6977	0.6299	0.2105			0.1389	0.0396	0.9872	0.5031	0.1446			0.0631	0.0396	0.2895	-0.1268	-0.0659
60	0.06	0.0187		0.3949	0.2528	0.0375			0.0212		0.4264	0.25	0.0385			0.0025		0.0315	-0.0028	0.001
66	0.066			0.3839	0.0372	0.0178			0.0236		0.3244	0.1684	0.0153			0.0236		-0.0595	0.1312	-0.0025
72	0.072			0.207		0.053			0.0173		0.2696	0.0668	0.0499			0.0173		0.0626	0.0668	-0.0031
78	0.078			0.2129					0.0404		0.1866	0.0273				0.0404		-0.0263	0.0273
84	0.084			0.1514							0.1588							0.0074
90	0.09			0.0439							0.065							0.0211
96	0.096			0.0843														-0.0843
102	0.102
108	0.108
114	0.114
120	0.12
126	0.126
132	0.132
138	0.138
144	0.144
150	0.15
156	0.156
162	0.162
168	0.168
174	0.174
180	0.18

## Sheet: 90°C FW Ca.Dm distribution
Supplementary Material S6
		before							after							difference
St.Th	St.Th	FW 90°C 1d	FW 90°C 3d	FW 90°C 7d	FW 90°C 21d	FW 90°C 14d	FW 90°C 30d		FW 90°C 1d	FW 90°C 3d	FW 90°C 7d	FW 90°C 14d	FW 90°C 21d	FW 90°C 30d		FW 90°C 1d	FW 90°C 3d	FW 90°C 7d	FW 90°C 14d	FW 90°C 21d	FW 90°C 30d
Mid-range	Mid-range	Percent volume in range							Percent volume in range							Percent volume in range
µm	mm	%							%							%
6	0.006	33.7853	19.4779	21.8341	21.0141	24.139	22.2693		26.0689	26.5366	31.016	33.4146	36.7964	32.6638		-7.7164	7.0587	9.1819	12.4005	12.6574	10.3945
12	0.012	19.2244	21.6048	33.3121	31.2075	32.376	37.176		20.0037	19.8721	28.1152	26.878	26.3343	29.4235		0.7793	-1.7327	-5.1969	-4.3295	-6.0417	-7.7525
18	0.018	15.1528	18.805	18.2172	24.8682	23.5076	23.3278		16.7565	17.1192	16.1485	20.1929	18.2194	19.5511		1.6037	-1.6858	-2.0687	-4.6753	-5.2882	-3.7767
24	0.024	13.8188	17.8194	11.6146	16.0619	13.6784	12.3634		15.661	16.3529	10.6457	13.6801	12.3135	12.5403		1.8422	-1.4665	-0.9689	-2.3818	-1.3649	0.1769
30	0.03	8.6397	10.3985	5.8181	5.0349	4.1839	3.4762		9.9128	9.2778	5.0155	4.5417	4.2551	4.0752		1.2731	-1.1207	-0.8026	-0.4932	0.0712	0.599
36	0.036	4.2383	4.2875	2.5854	1.1846	1.2249	0.9938		4.9844	4.1168	2.4352	0.9372	1.252	1.0987		0.7461	-0.1707	-0.1502	-0.2474	0.0271	0.1049
42	0.042	2.4033	2.3563	1.654	0.3276	0.6924	0.2979		3.0667	2.119	1.3626	0.2589	0.5879	0.4441		0.6634	-0.2373	-0.2914	-0.0687	-0.1045	0.1462
48	0.048	1.2502	0.9518	1.2917	0.0725	0.1978	0.0632		1.7139	0.8907	0.8389	0.0403	0.2259	0.1772		0.4637	-0.0611	-0.4528	-0.0322	0.0281	0.114
54	0.054	0.7285	0.5115	1.2117	0.0917		0.0324		0.9254	0.4409	0.9657	0.0563	0.0153	0.0261		0.1969	-0.0706	-0.246	-0.0354	0.0153	-0.0063
60	0.06	0.2252	0.4138	1.2423	0.0565				0.2976	0.3661	1.3296					0.0724	-0.0477	0.0873	-0.0565
66	0.066	0.2307	0.5926	0.6474	0.0194				0.238	0.4629	1.2061					0.0073	-0.1297	0.5587	-0.0194
72	0.072	0.2524	0.8832	0.4244	0.061				0.2485	0.7186	0.7109					-0.0039	-0.1646	0.2865	-0.061
78	0.078	0.0503	1.1105	0.1471					0.1227	1.1921	0.0675					0.0724	0.0816	-0.0796
84	0.084		0.5053							0.348	0.1428						-0.1573	0.1428
90	0.09		0.1783							0.0112							-0.1671
96	0.096		0.1036							0.0124							-0.0912
102	0.102									0.0259							0.0259
108	0.108									0.1369							0.1369
114	0.114
120	0.12
126	0.126
132	0.132
138	0.138
144	0.144
150	0.15
156	0.156
162	0.162
168	0.168
174	0.174
180	0.18

## Sheet: 30°C FWS Ca.Dm distribution
Supplementary Material S6
		before				after				difference
St.Th	St.Th	FWS 30°C 1d	FWS 30°C 14d	FWS 30°C 30d		FWS 30°C 1d	FWS 30°C 14d	FWS 30°C 30d		FWS 30°C 1d	FWS 30°C 14d	FWS 30°C 30d
Mid-range	Mid-range	Percent volume in range				Percent volume in range				Percent volume in range
µm	mm	%				%				%
6	0.006	28.6582	39.7351	18.2296		22.2122	24.127	19.3656		-6.446	-15.6081	1.136
12	0.012	14.8189	15.6346	15.7365		18.976	16.3134	16.8487		4.1571	0.6788	1.1122
18	0.018	17.8878	14.6914	18.1472		19.9416	19.8938	18.44		2.0538	5.2024	0.2928
24	0.024	17.9659	14.7617	21.7345		18.8367	20.2123	20.8557		0.8708	5.4506	-0.8788
30	0.03	11.1469	8.7091	14.4398		10.6107	11.693	13.7618		-0.5362	2.9839	-0.678
36	0.036	5.0517	3.5481	6.5149		4.6259	4.7388	6.0376		-0.4258	1.1907	-0.4773
42	0.042	2.5238	1.6025	3.1381		2.2182	1.9222	2.6436		-0.3056	0.3197	-0.4945
48	0.048	0.8628	0.544	0.918		0.7613	0.5902	0.9588		-0.1015	0.0462	0.0408
54	0.054	0.3777	0.293	0.4298		0.4528	0.2578	0.4432		0.0751	-0.0352	0.0134
60	0.06	0.2559	0.1211	0.2085		0.321	0.0867	0.2216		0.0651	-0.0344	0.0131
66	0.066	0.2309	0.1781	0.1434		0.2831	0.0418	0.0679		0.0522	-0.1363	-0.0755
72	0.072	0.0348	0.0927	0.0136		0.211	0.0707	0.0183		0.1762	-0.022	0.0047
78	0.078	0.0178	0.0192	0.0166		0.1149	0.0524	0.0127		0.0971	0.0332	-0.0039
84	0.084	0.0352	0.0694	0.0222		0.2124		0.0125		0.1772	-0.0694	-0.0097
90	0.09	0.0559		0.0133		0.1487		0.0139		0.0928		0.0006
96	0.096	0.0758		0.0272		0.0736		0.0369		-0.0022		0.0097
102	0.102			0.0302				0.0496				0.0194
108	0.108			0.0338				0.0212				-0.0126
114	0.114			0.0495				0.0413				-0.0082
120	0.12			0.1533				0.1488				-0.0045
126	0.126
132	0.132
138	0.138
144	0.144
150	0.15
156	0.156
162	0.162
168	0.168
174	0.174
180	0.18

## Sheet: 60°C FWS Ca.Dm distribution
Supplementary Material S6
		before							after							difference
St.Th	St.Th	FWS 60°C 1d	FWS 60°C 3d	FWS 60°C 7d	FWS 60°C 21d	FWS 60°C 14d	FWS 60°C 30d		FWS 60°C 1d	FWS 60°C 3d	FWS 60°C 7d	FWS 60°C 14d	FWS 60°C 21d	FWS 60°C 30d		FWS 60°C 1d	FWS 60°C 3d	FWS 60°C 7d	FWS 60°C 14d	FWS 60°C 21d	FWS 60°C 30d
Mid-range	Mid-range	Percent volume in range							Percent volume in range							Percent volume in range
µm	mm	%							%							%
6	0.006	37.3828	27.0349	26.7118	27.8006	28.0844	26.3749		29.2695	25.5806	27.0078	28.4166	23.8312	24.4487		-8.1133	-1.4543	0.296	0.616	-4.2532	-1.9262
12	0.012	23.1652	18.4126	14.5717	27.0973	21.9943	18.3768		25.3609	20.1814	15.4845	27.0277	24.4439	19.4492		2.1957	1.7688	0.9128	-0.0696	2.4496	1.0724
18	0.018	15.001	17.9547	19.1264	19.3314	22.1918	22.3706		16.9604	19.1633	19.2089	19.1243	23.6199	23.8002		1.9594	1.2086	0.0825	-0.2071	1.4281	1.4296
24	0.024	11.4635	18.0465	19.7873	15.0199	17.2215	18.8268		12.8623	17.6081	19.5021	15.0465	17.7725	18.7982		1.3988	-0.4384	-0.2852	0.0266	0.551	-0.0286
30	0.03	5.528	10.5181	10.2068	6.7465	6.6697	8.5242		6.4341	9.9267	10.1643	6.6103	6.5789	8.4439		0.9061	-0.5914	-0.0425	-0.1362	-0.0908	-0.0803
36	0.036	2.3716	3.9725	3.9472	2.2378	2.0336	3.3211		2.8204	3.7432	3.9041	2.1482	2.09	3.0596		0.4488	-0.2293	-0.0431	-0.0896	0.0564	-0.2615
42	0.042	1.789	1.8384	2.4134	0.8286	0.8839	1.4227		2.0922	1.5489	2.2449	0.753	0.8274	1.272		0.3032	-0.2895	-0.1685	-0.0756	-0.0565	-0.1507
48	0.048	1.1832	0.9617	1.1894	0.3598	0.4999	0.4212		1.4294	0.9304	0.9812	0.2934	0.4559	0.3078		0.2462	-0.0313	-0.2082	-0.0664	-0.044	-0.1134
54	0.054	0.8364	0.6071	0.5745	0.0859	0.1642	0.1604		1.1114	0.6511	0.5551	0.0981	0.1786	0.187		0.275	0.044	-0.0194	0.0122	0.0144	0.0266
60	0.06	0.6889	0.3926	0.4193	0.0377	0.0965	0.2015		0.9699	0.344	0.2652	0.0727	0.1172	0.0967		0.281	-0.0486	-0.1541	0.035	0.0207	-0.1048
66	0.066	0.4205	0.2092	0.2672	0.0705	0.1602			0.5433	0.1871	0.1881	0.0451	0.0845	0.1367		0.1228	-0.0221	-0.0791	-0.0254	-0.0757	0.1367
72	0.072	0.17	0.0516	0.1885	0.0376				0.1461	0.1352	0.0476	0.0559				-0.0239	0.0836	-0.1409	0.0183
78	0.078			0.0907	0.0397						0.0635	0.0611						-0.0272	0.0214
84	0.084			0.0698	0.0758						0.0853	0.0587						0.0155	-0.0171
90	0.09			0.1258	0.1341						0.0159	0.1882						-0.1099	0.0541
96	0.096			0.0263	0.0969						0.0197							-0.0066	-0.0969
102	0.102			0.0654							0.0648							-0.0006
108	0.108			0.0248							0.0287							0.0039
114	0.114			0.1937							0.1683							-0.0254
120	0.12
126	0.126
132	0.132
138	0.138
144	0.144
150	0.15
156	0.156
162	0.162
168	0.168
174	0.174
180	0.18

## Sheet: 90°C FWS Ca.Dm distribution
Supplementary Material S6
		before							after							difference
St.Th	St.Th	FWS 90°C 1d	FWS 90°C 3d	FWS 90°C 7d	FWS 90°C 21d	FWS 90°C 14d	FWS 90°C 30d		FWS 90°C 1d	FWS 90°C 3d	FWS 90°C 7d	FWS 90°C 14d	FWS 90°C 21d	FWS 90°C 30d		FWS 90°C 1d	FWS 90°C 3d	FWS 90°C 7d	FWS 90°C 14d	FWS 90°C 21d	FWS 90°C 30d
Mid-range	Mid-range	Percent volume in range							Percent volume in range							Percent volume in range
µm	mm	%							%							%
6	0.006	39.7752	30.385	29.0942	28.4426	23.6816	32.0104		25.7945	27.0335	32.4658	41.9546	36.4582	26.9996		-13.9807	-3.3515	3.3716	13.512	12.7766	-5.0108
12	0.012	25.5495	19.0942	15.7024	24.9809	20.3086	25.5015		30.4564	19.2412	20.2047	23.1827	20.8858	29.9669		4.9069	0.147	4.5023	-1.7982	0.5772	4.4654
18	0.018	17.8134	16.1382	21.1431	20.2353	22.5899	18.817		22.3583	18.6482	19.2265	16.9355	19.8841	21.4767		4.5449	2.51	-1.9166	-3.2998	-2.7058	2.6597
24	0.024	12.1133	16.04	19.7447	16.1462	19.5691	15.2189		15.092	16.6904	16.3862	12.0663	14.7207	15.1104		2.9787	0.6504	-3.3585	-4.0799	-4.8484	-0.1085
30	0.03	3.7355	9.0362	9.3837	7.2793	9.0356	6.2541		4.9065	8.9892	7.6319	4.3633	5.5456	5.0118		1.171	-0.047	-1.7518	-2.916	-3.49	-1.2423
36	0.036	0.8318	3.8883	3.5369	2.1634	3.1402	1.6099		1.1629	3.8539	2.7785	1.2015	1.6939	1.0454		0.3311	-0.0344	-0.7584	-0.9619	-1.4463	-0.5645
42	0.042	0.1419	2.1621	1.0111	0.6635	1.0527	0.4523		0.1816	2.0345	0.9424	0.2452	0.4741	0.3094		0.0397	-0.1276	-0.0687	-0.4183	-0.5786	-0.1429
48	0.048	0.0267	1.1788	0.3413	0.0889	0.3772	0.1206		0.0478	1.1172	0.2869	0.0508	0.2227	0.0799		0.0211	-0.0616	-0.0544	-0.0381	-0.1545	-0.0407
54	0.054	0.0127	0.912	0.021		0.1038	0.0153			0.9624	0.0456		0.0577			-0.0127	0.0504	0.0246		-0.0461	-0.0153
60	0.06		0.388	0.0215		0.1079				0.4951	0.0316		0.0572				0.1071	0.0101		-0.0507
66	0.066		0.2892			0.0334				0.3285							0.0393			-0.0334
72	0.072		0.305							0.4638							0.1588
78	0.078		0.1832							0.1419							-0.0413
84	0.084
90	0.09
96	0.096
102	0.102
108	0.108
114	0.114
120	0.12
126	0.126
132	0.132
138	0.138
144	0.144
150	0.15
156	0.156
162	0.162
168	0.168
174	0.174
180	0.18

## Sheet: 30°C SW Ca.Dm distribution
Supplementary Material S6
		before				after				difference
St.Th	St.Th	SW 30°C 1d	SW 30°C 14d	SW 30°C 30d		SW 30°C 1d	SW 30°C 14d	SW 30°C 30d		SW 30°C 1d	SW 30°C 14d	SW 30°C 30d
Mid-range	Mid-range	Percent volume in range				Percent volume in range				Percent volume in range
µm	mm	%				%				%
6	0.006	30.5363	30.1707	29.569		37.5095	28.0566	32.9838		6.9732	-2.1141	3.4148
12	0.012	26.7221	26.5051	29.5832		26.0821	27.3248	27.1712		-0.64	0.8197	-2.412
18	0.018	17.0371	19.084	22.7899		15.4825	20.0611	20.6408		-1.5546	0.9771	-2.1491
24	0.024	13.6002	15.3314	13.2963		11.5934	15.2091	13.5925		-2.0068	-0.1223	0.2962
30	0.03	6.5151	6.0421	3.6737		5.0632	5.9791	4.2163		-1.4519	-0.063	0.5426
36	0.036	2.1536	1.6819	0.8245		1.6713	1.398	1.0862		-0.4823	-0.2839	0.2617
42	0.042	0.9505	0.4333	0.202		0.8429	0.3852	0.2618		-0.1076	-0.0481	0.0598
48	0.048	0.7498	0.2438	0.0614		0.4994	0.129	0.0474		-0.2504	-0.1148	-0.014
54	0.054	0.426	0.1901			0.2778	0.2149			-0.1482	0.0248
60	0.06	0.5211	0.2104			0.3411	0.3262			-0.18	0.1158
66	0.066	0.3422	0.0459			0.3042	0.586			-0.038	0.5401
72	0.072	0.1206	0.0614			0.1636	0.223			0.043	0.1616
78	0.078	0.226				0.169	0.107			-0.057	0.107
84	0.084	0.0993								-0.0993
90	0.09
96	0.096
102	0.102
108	0.108
114	0.114
120	0.12
126	0.126
132	0.132
138	0.138
144	0.144
150	0.15
156	0.156
162	0.162
168	0.168
174	0.174
180	0.18

## Sheet: 60°C SW Ca.Dm distribution
Supplementary Material S6
		before							after							difference
St.Th	St.Th	SW 60°C 1d	SW 60°C 3d	SW 60°C 7d	SW 60°C 21d	SW 60°C 14d	SW 60°C 30d		SW 60°C 1d	SW 60°C 3d	SW 60°C 7d	SW 60°C 14d	SW 60°C 21d	SW 60°C 30d		SW 60°C 1d	SW 60°C 3d	SW 60°C 7d	SW 60°C 14d	SW 60°C 21d	SW 60°C 30d
Mid-range	Mid-range	Percent volume in range							Percent volume in range							Percent volume in range
µm	mm	%							%							%
6	0.006	23.8452	25.3096	24.7581	22.6614	21.9001	27.7071		28.1285	27.0422	28.8268	24.2701	32.5267	30.1987		4.2833	1.7326	4.0687	1.6087	10.6266	2.4916
12	0.012	30.6671	39.7467	23.3465	17.8709	31.3666	33.0698		28.388	37.1413	21.9154	18.8843	25.066	30.5099		-2.2791	-2.6054	-1.4311	1.0134	-6.3006	-2.5599
18	0.018	17.1986	17.7335	17.7462	19.6487	23.5362	16.788		15.7985	17.6607	16.3576	19.5896	18.9453	15.7489		-1.4001	-0.0728	-1.3886	-0.0591	-4.5909	-1.0391
24	0.024	12.3808	9.6159	15.3406	19.4603	14.6624	10.9409		11.5148	9.7653	14.5874	18.6434	13.6013	10.9413		-0.866	0.1494	-0.7532	-0.8169	-1.0611	0.0004
30	0.03	5.856	3.6695	8.9535	10.7643	5.1226	4.6759		5.766	3.8908	8.6464	10.1061	5.6828	4.831		-0.09	0.2213	-0.3071	-0.6582	0.5602	0.1551
36	0.036	2.5867	1.5504	3.797	5.1809	1.3157	1.8828		2.3984	1.6488	3.7552	4.3548	1.7149	2.023		-0.1883	0.0984	-0.0418	-0.8261	0.3992	0.1402
42	0.042	2.1158	1.3046	2.5312	2.5304	1.0873	1.5333		1.87	1.4442	2.4019	2.1936	0.9505	1.6151		-0.2458	0.1396	-0.1293	-0.3368	-0.1368	0.0818
48	0.048	1.8785	0.6321	1.4318	1.0018	0.7017	0.7708		2.192	0.8847	1.2298	0.96	0.6778	1.1415		0.3135	0.2526	-0.202	-0.0418	-0.0239	0.3707
54	0.054	1.8554	0.2184	1.0658	0.5214	0.2838	0.6046		1.8375	0.3775	1.2251	0.6176	0.4925	0.7231		-0.0179	0.1591	0.1593	0.0962	0.2087	0.1185
60	0.06	1.2259	0.0485	0.679	0.2729	0.0237	0.5042		1.4182	0.1149	0.6566	0.1917	0.146	0.567		0.1923	0.0664	-0.0224	-0.0812	0.1223	0.0628
66	0.066	0.3899	0.1223	0.2668	0.087		0.5222		0.5744	0.0296	0.3978	0.0573	0.0867	0.485		0.1845	-0.0927	0.131	-0.0297	0.0867	-0.0372
72	0.072		0.0484	0.0834			0.4685		0.1137			0.0313	0.1094	0.4609		0.1137	-0.0484	-0.0834	0.0313	0.1094	-0.0076
78	0.078						0.288					0.0486		0.4527					0.0486		0.1647
84	0.084						0.2439					0.0516		0.3018					0.0516		0.0579
90	0.09
96	0.096
102	0.102
108	0.108
114	0.114
120	0.12
126	0.126
132	0.132
138	0.138
144	0.144
150	0.15
156	0.156
162	0.162
168	0.168
174	0.174
180	0.18

## Sheet: 90°C SW Ca.Dm distribution
Supplementary Material S6
		before							after							difference
St.Th	St.Th	SW 90°C 1d	SW 90°C 3d	SW 90°C 7d	SW 90°C 21d	SW 90°C 14d	SW 90°C 30d		SW 90°C 1d	SW 90°C 3d	SW 90°C 7d	SW 90°C 14d	SW 90°C 21d	SW 90°C 30d		SW 90°C 1d	SW 90°C 3d	SW 90°C 7d	SW 90°C 14d	SW 90°C 21d	SW 90°C 30d
Mid-range	Mid-range	Percent volume in range							Percent volume in range							Percent volume in range
µm	mm	%							%							%
6	0.006	31.1829	16.5891	22.4658	25.7724	27.5385	27.8542		25.7998	20.7825	30.7139	35.5671	32.5623	23.1695		-5.3831	4.1934	8.2481	9.7947	5.0238	-4.6847
12	0.012	15.3367	17.2955	28.6347	26.4835	24.629	22.5601		16.6987	17.4411	25.7232	22.9319	23.7522	20.285		1.362	0.1456	-2.9115	-3.5516	-0.8768	-2.2751
18	0.018	17.6651	18.8128	23.9783	22.4076	23.3445	22.2209		17.1734	17.0288	20.5308	18.9489	21.6055	22.6802		-0.4917	-1.784	-3.4475	-3.4587	-1.739	0.4593
24	0.024	18.7524	21.0821	15.5893	15.5358	16.366	15.7236		18.6391	19.1389	13.9238	13.5366	14.7507	18.961		-0.1133	-1.9432	-1.6655	-1.9992	-1.6153	3.2374
30	0.03	10.1927	13.3984	5.5065	5.5338	5.5672	6.4164		11.7317	12.706	5.1403	5.0488	4.8448	8.5435		1.539	-0.6924	-0.3662	-0.485	-0.7224	2.1271
36	0.036	3.8073	6.2481	1.5551	1.9985	1.5324	2.7697		5.2847	6.225	1.4514	1.7111	1.3362	3.3202		1.4774	-0.0231	-0.1037	-0.2874	-0.1962	0.5505
42	0.042	1.6088	3.6637	1.0686	0.9836	0.7503	1.3078		2.4685	3.3829	0.8854	0.7498	0.8204	1.5838		0.8597	-0.2808	-0.1832	-0.2338	0.0701	0.276
48	0.048	0.6256	1.3092	0.7426	0.7567	0.2187	0.6986		0.9808	1.5658	1.0237	0.6406	0.2601	0.827		0.3552	0.2566	0.2811	-0.1161	0.0414	0.1284
54	0.054	0.3301	0.7292	0.4055	0.3362	0.0535	0.3012		0.3883	0.7435	0.3744	0.62	0.0677	0.5019		0.0582	0.0143	-0.0311	0.2838	0.0142	0.2007
60	0.06	0.1388	0.4927	0.0536	0.1484		0.1475		0.269	0.4277	0.1836	0.2453		0.128		0.1302	-0.065	0.13	0.0969		-0.0195
66	0.066	0.1897	0.1125		0.0437				0.2171	0.1824	0.0495					0.0274	0.0699	0.0495	-0.0437
72	0.072	0.0488	0.0515						0.15	0.1376						0.1012	0.0861
78	0.078	0.0146	0.0775						0.062	0.0772						0.0474	-0.0003
84	0.084	0.015	0.1377						0.0209	0.1607						0.0059	0.023
90	0.09	0.0914							0.0291							-0.0623
96	0.096								0.0867							0.0867
102	0.102
108	0.108
114	0.114
120	0.12
126	0.126
132	0.132
138	0.138
144	0.144
150	0.15
156	0.156
162	0.162
168	0.168
174	0.174
180	0.18
